# Supplementary material for: Risky injection practices and HCV awareness in Chiang Mai Province, Thailand: a respondent-driven sampling study of people who inject drugs
Source: Springer Nature journal article supplement (doi:10.1186/s12889-020-09549-w), 2020-09-24
Supplement: MOESM1 [file 12889_2020_9549_MOESM1_ESM.pdf]

## RDS Screening Form

|                                                                                                                                                                                                                               |                                                                                                                                                                                                                                                                                                                                                                                 |
|-------------------------------------------------------------------------------------------------------------------------------------------------------------------------------------------------------------------------------|---------------------------------------------------------------------------------------------------------------------------------------------------------------------------------------------------------------------------------------------------------------------------------------------------------------------------------------------------------------------------------|
| Coupon number    _ _ _ _ _ _ _ _ _ _ _ _ _ _ _ _                                                                                                                                                                              |                                                                                                                                                                                                                                                                                                                                                                                 |
| Interviewer initials         _____                                                                                                                                                                                            | Date of interview            _ _     _ _     _ _ _ _ <br>Time interview start        _ _  H  _ _  M                                                                                                                                                                                                                                                                             |
| 1. How old are you?                                                                                                                                                                                                           | _ _  years old<br><br><input type="checkbox"/> >= 18, eligible <input type="checkbox"/> <18, ineligible                                                                                                                                                                                                                                                                         |
| 2. When was the last time you injected drugs?<br>(– ask to see stigmata)                                                                                                                                                      | _____<br><br><input type="checkbox"/> < 6 months, eligible <input type="checkbox"/> > 6 months, ineligible                                                                                                                                                                                                                                                                      |
| 3. In what province do you live or work – or socialize?                                                                                                                                                                       | _____<br><br><input type="checkbox"/> Chiang Mai Province, eligible <input type="checkbox"/> Other province, ineligible                                                                                                                                                                                                                                                         |
| 4. What is the main reason you accepted a coupon and enrolled in this survey?<br><b><i>(Select only one response)</i></b>                                                                                                     | <input type="checkbox"/> <sub>1</sub> For the incentive<br><input type="checkbox"/> <sub>2</sub> Recommendation from person who gave coupon<br><input type="checkbox"/> <sub>3</sub> The survey seemed interesting/useful<br><input type="checkbox"/> <sub>4</sub> I have free time<br><input type="checkbox"/> <sub>77</sub> Other (Specify): _____<br>_____<br>_____<br>_____ |
| <b>Conduct consent form now</b>                                                                                                                                                                                               |                                                                                                                                                                                                                                                                                                                                                                                 |
| 5. How many people do you know, (you know their name and they know yours), who have injected drugs in the past six months?<br><b><i>(Participants must provide a response to this question – response cannot be zero)</i></b> | Number            _ _ _ _                                                                                                                                                                                                                                                                                                                                                       |
| 6. How many of them have you seen in the past month?<br><b><i>(Participants must provide a response to this question – response cannot be zero)</i></b>                                                                       | Number            _ _ _ _ <br><i>(this number cannot be larger than number above)</i>                                                                                                                                                                                                                                                                                           |
| 7. How many of them are 18 years and older?<br><b><i>(Participants must provide a response to this question – response cannot be zero)</i></b>                                                                                | Number            _ _ _ _ <br><i>(this number cannot be larger than number above)</i>                                                                                                                                                                                                                                                                                           |
| 8. How many of them live in the Chiang Mai Province?<br><b><i>(Participants must provide a response to this question – response cannot be zero)</i></b>                                                                       | Number            _ _ _ _  -> <b>Report number on the checklist</b><br><i>(this number cannot be larger than number above)</i>                                                                                                                                                                                                                                                  |
| 9. How many of them are female?<br><b><i>(Participants must provide a response to this question)</i></b>                                                                                                                      | Number            _ _ _ _ <br><i>(this number cannot be larger than number above)</i>                                                                                                                                                                                                                                                                                           |

**Interviewer's notice:**

- Do not read answers.
- Show the question's corresponding card when mentioned.
- Ask for specifications when mentioned.
- Skip questions when mentioned.

**SECTION 1 SOCIAL DEMOGRAPHIC CHARACTERISTICS**

"I would like to start this interview by asking you questions about your personal background."

| No. | QUESTION                                                   | ANSWER                                                                                                                                                                                                                                                                                                                                                                                                                                                                                                                                                                                              |
|-----|------------------------------------------------------------|-----------------------------------------------------------------------------------------------------------------------------------------------------------------------------------------------------------------------------------------------------------------------------------------------------------------------------------------------------------------------------------------------------------------------------------------------------------------------------------------------------------------------------------------------------------------------------------------------------|
| 1.1 | What is your gender?                                       | <input type="checkbox"/> <sub>1</sub> Male<br><input type="checkbox"/> <sub>2</sub> Female<br><input type="checkbox"/> <sub>3</sub> Transgender<br><div style="text-align: right;"><input type="checkbox"/><sub>88</sub> DNK   <input type="checkbox"/><sub>99</sub> Refusal</div>                                                                                                                                                                                                                                                                                                                  |
| 1.2 | What year were you born?                                   | I _ 2 _ 1 5 _ 1 _ 1 _ 1<br><div style="text-align: right;"><input type="checkbox"/><sub>88</sub> DNK   <input type="checkbox"/><sub>99</sub> Refusal</div>                                                                                                                                                                                                                                                                                                                                                                                                                                          |
| 1.3 | What is your ethnicity?                                    | _____<br><div style="text-align: right;"><input type="checkbox"/><sub>88</sub> DNK   <input type="checkbox"/><sub>99</sub> Refusal</div>                                                                                                                                                                                                                                                                                                                                                                                                                                                            |
| 1.4 | Do you have the Thai citizenship?                          | <input type="checkbox"/> <sub>1</sub> No<br><input type="checkbox"/> <sub>2</sub> Yes (specify color of ID card): _____<br><div style="text-align: right;"><input type="checkbox"/><sub>88</sub> DNK   <input type="checkbox"/><sub>99</sub> Refusal</div>                                                                                                                                                                                                                                                                                                                                          |
| 1.5 | What is your marital status?                               | <input type="checkbox"/> <sub>1</sub> Single (never married)<br><input type="checkbox"/> <sub>2</sub> Married<br><input type="checkbox"/> <sub>3</sub> In a relationship<br><input type="checkbox"/> <sub>4</sub> Widowed<br><input type="checkbox"/> <sub>5</sub> Divorced or separated<br><input type="checkbox"/> <sub>77</sub> Other (Specify): _____<br>_____<br><div style="text-align: right;"><input type="checkbox"/><sub>88</sub> DNK   <input type="checkbox"/><sub>99</sub> Refusal</div>                                                                                               |
| 1.6 | Do you have children or relatives that you are supporting? | <input type="checkbox"/> <sub>1</sub> No<br><input type="checkbox"/> <sub>2</sub> Yes (Specify): _____<br><div style="text-align: right;"><input type="checkbox"/><sub>88</sub> DNK   <input type="checkbox"/><sub>99</sub> Refusal</div>                                                                                                                                                                                                                                                                                                                                                           |
| 1.7 | What is your highest education level?                      | <input type="checkbox"/> <sub>1</sub> I didn't go to school<br><input type="checkbox"/> <sub>2</sub> I didn't finish primary school<br><input type="checkbox"/> <sub>3</sub> Primary school<br><input type="checkbox"/> <sub>4</sub> Secondary school<br><input type="checkbox"/> <sub>5</sub> Some vocational, teacher training<br><input type="checkbox"/> <sub>6</sub> College or university<br><input type="checkbox"/> <sub>77</sub> Other (Specify): _____<br><div style="text-align: right;"><input type="checkbox"/><sub>88</sub> DNK   <input type="checkbox"/><sub>99</sub> Refusal</div> |
| 1.8 | Which language do you feel most comfortable using?         | Language _____<br><div style="text-align: right;"><input type="checkbox"/><sub>88</sub> DNK   <input type="checkbox"/><sub>99</sub> Refusal</div>                                                                                                                                                                                                                                                                                                                                                                                                                                                   |

|      |                                                                                                           |                                                                                                                                                                                                                                                                                                                                                                                                                                                                                                          |                                                                                                                                                                                                                                                                                                                                                                                  |
|------|-----------------------------------------------------------------------------------------------------------|----------------------------------------------------------------------------------------------------------------------------------------------------------------------------------------------------------------------------------------------------------------------------------------------------------------------------------------------------------------------------------------------------------------------------------------------------------------------------------------------------------|----------------------------------------------------------------------------------------------------------------------------------------------------------------------------------------------------------------------------------------------------------------------------------------------------------------------------------------------------------------------------------|
| 1.9  | What is your Thai language ability?<br>a) Understand<br>b) Speak<br>c) Read<br>d) Write                   | <input type="checkbox"/> <sub>1</sub> ☺ <input type="checkbox"/> <sub>2</sub> ☹ <input type="checkbox"/> <sub>3</sub> ☹<br><input type="checkbox"/> <sub>1</sub> ☺ <input type="checkbox"/> <sub>2</sub> ☹ <input type="checkbox"/> <sub>3</sub> ☹<br><input type="checkbox"/> <sub>1</sub> ☺ <input type="checkbox"/> <sub>2</sub> ☹ <input type="checkbox"/> <sub>3</sub> ☹<br><input type="checkbox"/> <sub>1</sub> ☺ <input type="checkbox"/> <sub>2</sub> ☹ <input type="checkbox"/> <sub>3</sub> ☹ | <input type="checkbox"/> <sub>88</sub> DNK <input type="checkbox"/> <sub>99</sub> Refusal<br><input type="checkbox"/> <sub>88</sub> DNK <input type="checkbox"/> <sub>99</sub> Refusal<br><input type="checkbox"/> <sub>88</sub> DNK <input type="checkbox"/> <sub>99</sub> Refusal<br><input type="checkbox"/> <sub>88</sub> DNK <input type="checkbox"/> <sub>99</sub> Refusal |
| 1.10 | What are your current living circumstances (in the last month)?                                           | <input type="checkbox"/> <sub>1</sub> In your own place<br><input type="checkbox"/> <sub>2</sub> At your family's place<br><input type="checkbox"/> <sub>3</sub> At a friend's place<br><input type="checkbox"/> <sub>4</sub> In an institution<br><input type="checkbox"/> <sub>5</sub> In daily rental place<br><input type="checkbox"/> <sub>6</sub> On the street<br><input type="checkbox"/> <sub>77</sub> Other (Specify): _____<br>_____                                                          | <input type="checkbox"/> <sub>88</sub> DNK <input type="checkbox"/> <sub>99</sub> Refusal                                                                                                                                                                                                                                                                                        |
| 1.11 | In the place(s) you are currently staying, is there:<br>a) Piped water?<br>b) Electricity?<br>c) Toilets? | <input type="checkbox"/> <sub>1</sub> No <input type="checkbox"/> <sub>2</sub> Yes<br><input type="checkbox"/> <sub>1</sub> No <input type="checkbox"/> <sub>2</sub> Yes<br><input type="checkbox"/> <sub>1</sub> No <input type="checkbox"/> <sub>2</sub> Yes                                                                                                                                                                                                                                           | <input type="checkbox"/> <sub>88</sub> DNK <input type="checkbox"/> <sub>99</sub> Refusal<br><input type="checkbox"/> <sub>88</sub> DNK <input type="checkbox"/> <sub>99</sub> Refusal<br><input type="checkbox"/> <sub>88</sub> DNK <input type="checkbox"/> <sub>99</sub> Refusal                                                                                              |
| 1.12 | Do you have access to internet?                                                                           | <input type="checkbox"/> <sub>1</sub> No <b>→ 1.14</b><br><input type="checkbox"/> <sub>2</sub> Yes                                                                                                                                                                                                                                                                                                                                                                                                      | <input type="checkbox"/> <sub>88</sub> DNK <input type="checkbox"/> <sub>99</sub> Refusal                                                                                                                                                                                                                                                                                        |
| 1.13 | Where do you connect to the internet usually?<br><b>(Show the card, several answers possible)</b>         | <input type="checkbox"/> <sub>1</sub> Own computer<br><input type="checkbox"/> <sub>2</sub> Own mobile phone<br><input type="checkbox"/> <sub>3</sub> Friend's computer<br><input type="checkbox"/> <sub>4</sub> Friend's mobile phone<br><input type="checkbox"/> <sub>5</sub> Internet café<br><input type="checkbox"/> <sub>77</sub> Other (Specify): _____<br>_____                                                                                                                                  | <input type="checkbox"/> <sub>88</sub> DNK <input type="checkbox"/> <sub>99</sub> Refusal                                                                                                                                                                                                                                                                                        |
| 1.14 | What is your current working status?                                                                      | <input type="checkbox"/> <sub>1</sub> Permanent wage work<br><input type="checkbox"/> <sub>2</sub> Government employee<br><input type="checkbox"/> <sub>3</sub> Day labor<br><input type="checkbox"/> <sub>4</sub> Student<br><input type="checkbox"/> <sub>5</sub> Unemployed<br><input type="checkbox"/> <sub>6</sub> Unable to work<br><input type="checkbox"/> <sub>77</sub> Other (Specify): _____<br>_____                                                                                         | <input type="checkbox"/> <sub>88</sub> DNK <input type="checkbox"/> <sub>99</sub> Refusal                                                                                                                                                                                                                                                                                        |
| 1.15 | Do you have a regular income?                                                                             | <input type="checkbox"/> <sub>1</sub> No<br><input type="checkbox"/> <sub>2</sub> Yes                                                                                                                                                                                                                                                                                                                                                                                                                    | <input type="checkbox"/> <sub>88</sub> DNK <input type="checkbox"/> <sub>99</sub> Refusal                                                                                                                                                                                                                                                                                        |



| SECTION 2 DRUG USE                                                                            |                                                                                                                                                                 |                                                                                                                                                                 |                                                                                                                                                                 |                                                                                                                                                                 |                                                                                                                                                                 |                                                                                                                                                                 |                                                                                                                                                                 |                                                                                                                                                                 |                                                                                                                                                                 |                                                                                                                                                                 |                                                                                                                                                                 |                                                                                                                          |                                                                                                                          |
|-----------------------------------------------------------------------------------------------|-----------------------------------------------------------------------------------------------------------------------------------------------------------------|-----------------------------------------------------------------------------------------------------------------------------------------------------------------|-----------------------------------------------------------------------------------------------------------------------------------------------------------------|-----------------------------------------------------------------------------------------------------------------------------------------------------------------|-----------------------------------------------------------------------------------------------------------------------------------------------------------------|-----------------------------------------------------------------------------------------------------------------------------------------------------------------|-----------------------------------------------------------------------------------------------------------------------------------------------------------------|-----------------------------------------------------------------------------------------------------------------------------------------------------------------|-----------------------------------------------------------------------------------------------------------------------------------------------------------------|-----------------------------------------------------------------------------------------------------------------------------------------------------------------|-----------------------------------------------------------------------------------------------------------------------------------------------------------------|--------------------------------------------------------------------------------------------------------------------------|--------------------------------------------------------------------------------------------------------------------------|
| “The next questions are related to the practice of using drugs.”                              |                                                                                                                                                                 |                                                                                                                                                                 |                                                                                                                                                                 |                                                                                                                                                                 |                                                                                                                                                                 |                                                                                                                                                                 |                                                                                                                                                                 |                                                                                                                                                                 |                                                                                                                                                                 |                                                                                                                                                                 |                                                                                                                                                                 |                                                                                                                          |                                                                                                                          |
| 2.1 Which drugs have you used in the last 6 months?<br><i>(Several answers possible)</i>      | Heroin                                                                                                                                                          | Opium                                                                                                                                                           | Methadone                                                                                                                                                       | Ya-Ba                                                                                                                                                           | Ice                                                                                                                                                             | Midazolam/<br>sleeping pill                                                                                                                                     | Cannabis                                                                                                                                                        | Glue                                                                                                                                                            | Cocaine                                                                                                                                                         | Ecstasy                                                                                                                                                         | Alcohol                                                                                                                                                         | Other<br>(Specify):<br>-----<br>-----<br>-----                                                                           |                                                                                                                          |
|                                                                                               | <input type="checkbox"/> <sub>1</sub> No<br><input type="checkbox"/> <sub>2</sub> Yes<br><input type="checkbox"/> 88 DNK<br><input type="checkbox"/> 99 Refusal | <input type="checkbox"/> <sub>1</sub> No<br><input type="checkbox"/> <sub>2</sub> Yes<br><input type="checkbox"/> 88 DNK<br><input type="checkbox"/> 99 Refusal | <input type="checkbox"/> <sub>1</sub> No<br><input type="checkbox"/> <sub>2</sub> Yes<br><input type="checkbox"/> 88 DNK<br><input type="checkbox"/> 99 Refusal | <input type="checkbox"/> <sub>1</sub> No<br><input type="checkbox"/> <sub>2</sub> Yes<br><input type="checkbox"/> 88 DNK<br><input type="checkbox"/> 99 Refusal | <input type="checkbox"/> <sub>1</sub> No<br><input type="checkbox"/> <sub>2</sub> Yes<br><input type="checkbox"/> 88 DNK<br><input type="checkbox"/> 99 Refusal | <input type="checkbox"/> <sub>1</sub> No<br><input type="checkbox"/> <sub>2</sub> Yes<br><input type="checkbox"/> 88 DNK<br><input type="checkbox"/> 99 Refusal | <input type="checkbox"/> <sub>1</sub> No<br><input type="checkbox"/> <sub>2</sub> Yes<br><input type="checkbox"/> 88 DNK<br><input type="checkbox"/> 99 Refusal | <input type="checkbox"/> <sub>1</sub> No<br><input type="checkbox"/> <sub>2</sub> Yes<br><input type="checkbox"/> 88 DNK<br><input type="checkbox"/> 99 Refusal | <input type="checkbox"/> <sub>1</sub> No<br><input type="checkbox"/> <sub>2</sub> Yes<br><input type="checkbox"/> 88 DNK<br><input type="checkbox"/> 99 Refusal | <input type="checkbox"/> <sub>1</sub> No<br><input type="checkbox"/> <sub>2</sub> Yes<br><input type="checkbox"/> 88 DNK<br><input type="checkbox"/> 99 Refusal | <input type="checkbox"/> <sub>1</sub> No<br><input type="checkbox"/> <sub>2</sub> Yes<br><input type="checkbox"/> 88 DNK<br><input type="checkbox"/> 99 Refusal | <input type="checkbox"/> 88 DNK<br><input type="checkbox"/> 99 Refusal                                                   |                                                                                                                          |
| <i>(For each drug used in the last 6 months, ask the questions below in a vertical order)</i> |                                                                                                                                                                 |                                                                                                                                                                 |                                                                                                                                                                 |                                                                                                                                                                 |                                                                                                                                                                 |                                                                                                                                                                 |                                                                                                                                                                 |                                                                                                                                                                 |                                                                                                                                                                 |                                                                                                                                                                 |                                                                                                                                                                 |                                                                                                                          |                                                                                                                          |
| 2.2 How often did you use it?                                                                 | ↓                                                                                                                                                               | ↓                                                                                                                                                               | ↓                                                                                                                                                               | ↓                                                                                                                                                               | ↓                                                                                                                                                               | ↓                                                                                                                                                               | ↓                                                                                                                                                               | ↓                                                                                                                                                               | ↓                                                                                                                                                               | ↓                                                                                                                                                               | ↓                                                                                                                                                               | ↓                                                                                                                        |                                                                                                                          |
| 1) One or several times per day                                                               | <input type="checkbox"/> <sub>1</sub>                                                                                                                           | <input type="checkbox"/> <sub>1</sub>                                                                                    |                                                                                                                          |
| 2) One or several times per week but not every day                                            | <input type="checkbox"/> <sub>2</sub>                                                                                                                           | <input type="checkbox"/> <sub>2</sub>                                                                                    |                                                                                                                          |
| 3) Several times per month but not every week                                                 | <input type="checkbox"/> <sub>3</sub>                                                                                                                           | <input type="checkbox"/> <sub>3</sub>                                                                                    |                                                                                                                          |
| 4) Less than that                                                                             | <input type="checkbox"/> <sub>4</sub><br><input type="checkbox"/> 88 DNK<br><input type="checkbox"/> 99 Refusal                                                 | <input type="checkbox"/> <sub>4</sub><br><input type="checkbox"/> 88 DNK<br><input type="checkbox"/> 99 Refusal                                                 | <input type="checkbox"/> <sub>4</sub><br><input type="checkbox"/> 88 DNK<br><input type="checkbox"/> 99 Refusal                                                 | <input type="checkbox"/> <sub>4</sub><br><input type="checkbox"/> 88 DNK<br><input type="checkbox"/> 99 Refusal                                                 | <input type="checkbox"/> <sub>4</sub><br><input type="checkbox"/> 88 DNK<br><input type="checkbox"/> 99 Refusal                                                 | <input type="checkbox"/> <sub>4</sub><br><input type="checkbox"/> 88 DNK<br><input type="checkbox"/> 99 Refusal                                                 | <input type="checkbox"/> <sub>4</sub><br><input type="checkbox"/> 88 DNK<br><input type="checkbox"/> 99 Refusal                                                 | <input type="checkbox"/> <sub>4</sub><br><input type="checkbox"/> 88 DNK<br><input type="checkbox"/> 99 Refusal                                                 | <input type="checkbox"/> <sub>4</sub><br><input type="checkbox"/> 88 DNK<br><input type="checkbox"/> 99 Refusal                                                 | <input type="checkbox"/> <sub>4</sub><br><input type="checkbox"/> 88 DNK<br><input type="checkbox"/> 99 Refusal                                                 | <input type="checkbox"/> <sub>4</sub><br><input type="checkbox"/> 88 DNK<br><input type="checkbox"/> 99 Refusal                                                 | <input type="checkbox"/> <sub>4</sub><br><input type="checkbox"/> 88 DNK<br><input type="checkbox"/> 99 Refusal          |                                                                                                                          |
| 2.3 How do you currently use it? <i>(Several answers possible)</i>                            |                                                                                                                                                                 |                                                                                                                                                                 |                                                                                                                                                                 |                                                                                                                                                                 |                                                                                                                                                                 |                                                                                                                                                                 |                                                                                                                                                                 |                                                                                                                                                                 |                                                                                                                                                                 |                                                                                                                                                                 |                                                                                                                                                                 |                                                                                                                          |                                                                                                                          |
| 1) Oral                                                                                       | <input type="checkbox"/> <sub>1</sub>                                                                                                                           | <input type="checkbox"/> <sub>1</sub>                                                                                    |                                                                                                                          |
| 2) Sniffed                                                                                    | <input type="checkbox"/> <sub>2</sub>                                                                                                                           | <input type="checkbox"/> <sub>2</sub>                                                                                    |                                                                                                                          |
| 3) Smoked                                                                                     | <input type="checkbox"/> <sub>3</sub>                                                                                                                           | <input type="checkbox"/> <sub>3</sub>                                                                                    |                                                                                                                          |
| 4) Inhaled                                                                                    | <input type="checkbox"/> <sub>4</sub>                                                                                                                           | <input type="checkbox"/> <sub>4</sub>                                                                                    |                                                                                                                          |
| 5) Injected                                                                                   | <input type="checkbox"/> <sub>5</sub><br><input type="checkbox"/> 88 DNK<br><input type="checkbox"/> 99 Refusal                                                 | <input type="checkbox"/> <sub>5</sub><br><input type="checkbox"/> 88 DNK<br><input type="checkbox"/> 99 Refusal                                                 | <input type="checkbox"/> <sub>5</sub><br><input type="checkbox"/> 88 DNK<br><input type="checkbox"/> 99 Refusal                                                 | <input type="checkbox"/> <sub>5</sub><br><input type="checkbox"/> 88 DNK<br><input type="checkbox"/> 99 Refusal                                                 | <input type="checkbox"/> <sub>5</sub><br><input type="checkbox"/> 88 DNK<br><input type="checkbox"/> 99 Refusal                                                 | <input type="checkbox"/> <sub>5</sub><br><input type="checkbox"/> 88 DNK<br><input type="checkbox"/> 99 Refusal                                                 | <input type="checkbox"/> <sub>5</sub><br><input type="checkbox"/> 88 DNK<br><input type="checkbox"/> 99 Refusal                                                 | <input type="checkbox"/> <sub>5</sub><br><input type="checkbox"/> 88 DNK<br><input type="checkbox"/> 99 Refusal                                                 | <input type="checkbox"/> <sub>5</sub><br><input type="checkbox"/> 88 DNK<br><input type="checkbox"/> 99 Refusal                                                 | <input type="checkbox"/> <sub>5</sub><br><input type="checkbox"/> 88 DNK<br><input type="checkbox"/> 99 Refusal                                                 | <input type="checkbox"/> <sub>5</sub><br><input type="checkbox"/> 88 DNK<br><input type="checkbox"/> 99 Refusal                                                 | <input type="checkbox"/> <sub>5</sub><br><input type="checkbox"/> 88 DNK<br><input type="checkbox"/> 99 Refusal          |                                                                                                                          |
| 2.4 What was your age approximatively when you first used it?                                 | -----<br><input type="checkbox"/> 88 DNK<br><input type="checkbox"/> 99 Refusal                                                                                 | -----<br><input type="checkbox"/> 88 DNK<br><input type="checkbox"/> 99 Refusal                                          |                                                                                                                          |
| 2.5 How much did you spend in the <u>last week</u> to purchase this drug?                     | -----<br>Baht<br><input type="checkbox"/> Free<br><input type="checkbox"/> 88 DNK<br><input type="checkbox"/> 99 Refusal                                        | -----<br>Baht<br><input type="checkbox"/> Free<br><input type="checkbox"/> 88 DNK<br><input type="checkbox"/> 99 Refusal                                        | -----<br>Baht<br><input type="checkbox"/> Free<br><input type="checkbox"/> 88 DNK<br><input type="checkbox"/> 99 Refusal                                        | -----<br>Baht<br><input type="checkbox"/> Free<br><input type="checkbox"/> 88 DNK<br><input type="checkbox"/> 99 Refusal                                        | -----<br>Baht<br><input type="checkbox"/> Free<br><input type="checkbox"/> 88 DNK<br><input type="checkbox"/> 99 Refusal                                        | -----<br>Baht<br><input type="checkbox"/> Free<br><input type="checkbox"/> 88 DNK<br><input type="checkbox"/> 99 Refusal                                        | -----<br>Baht<br><input type="checkbox"/> Free<br><input type="checkbox"/> 88 DNK<br><input type="checkbox"/> 99 Refusal                                        | -----<br>Baht<br><input type="checkbox"/> Free<br><input type="checkbox"/> 88 DNK<br><input type="checkbox"/> 99 Refusal                                        | -----<br>Baht<br><input type="checkbox"/> Free<br><input type="checkbox"/> 88 DNK<br><input type="checkbox"/> 99 Refusal                                        | -----<br>Baht<br><input type="checkbox"/> Free<br><input type="checkbox"/> 88 DNK<br><input type="checkbox"/> 99 Refusal                                        | -----<br>Baht<br><input type="checkbox"/> Free<br><input type="checkbox"/> 88 DNK<br><input type="checkbox"/> 99 Refusal                                        | -----<br>Baht<br><input type="checkbox"/> Free<br><input type="checkbox"/> 88 DNK<br><input type="checkbox"/> 99 Refusal | -----<br>Baht<br><input type="checkbox"/> Free<br><input type="checkbox"/> 88 DNK<br><input type="checkbox"/> 99 Refusal |

| SECTION 3 INJECTION DRUG USE                                  |                                                                                                                                      |                                                                                                                                                                                                                                                                                                                                                                                                                                                                                                                                                                                                                                                                                                                 |
|---------------------------------------------------------------|--------------------------------------------------------------------------------------------------------------------------------------|-----------------------------------------------------------------------------------------------------------------------------------------------------------------------------------------------------------------------------------------------------------------------------------------------------------------------------------------------------------------------------------------------------------------------------------------------------------------------------------------------------------------------------------------------------------------------------------------------------------------------------------------------------------------------------------------------------------------|
| “The next questions are related to your injecting practices.” |                                                                                                                                      |                                                                                                                                                                                                                                                                                                                                                                                                                                                                                                                                                                                                                                                                                                                 |
| 3.1                                                           | How old were you when you <u>injected</u> any drug <u>for the first time</u> ?                                                       | <div>I _ _ _ years old</div> <div><input type="checkbox"/><sub>88</sub> DNK <input type="checkbox"/><sub>99</sub> Refusal</div>                                                                                                                                                                                                                                                                                                                                                                                                                                                                                                                                                                                 |
| 3.2                                                           | When was <u>the last time</u> you injected any drugs?                                                                                | <div> <input type="checkbox"/><sub>1</sub> Today/yesterday<br/> <input type="checkbox"/><sub>2</sub> In last week<br/> <input type="checkbox"/><sub>3</sub> In last month (but more than a week ago)<br/> <input type="checkbox"/><sub>4</sub> 2-6 months ago → 3.4 </div> <div><input type="checkbox"/><sub>88</sub> DNK <input type="checkbox"/><sub>99</sub> Refusal</div>                                                                                                                                                                                                                                                                                                                                   |
| 3.3                                                           | How often did you inject any drugs during <u>the past month</u> ?                                                                    | <div> <input type="checkbox"/><sub>1</sub> Every day<br/> <input type="checkbox"/><sub>2</sub> Every second day<br/> <input type="checkbox"/><sub>3</sub> Every third day<br/> <input type="checkbox"/><sub>4</sub> Once in a week<br/> <input type="checkbox"/><sub>5</sub> Once in a month </div> <div><input type="checkbox"/><sub>88</sub> DNK <input type="checkbox"/><sub>99</sub> Refusal</div>                                                                                                                                                                                                                                                                                                          |
| 3.4                                                           | In <u>the last year</u> where or from whom did you get needles/syringes for injection of drugs?<br><b>(Several answers possible)</b> | <div> <input type="checkbox"/><sub>1</sub> Purchased at a pharmacy<br/> <input type="checkbox"/><sub>2</sub> In NGO which has a needles and syringes exchange programme (Specify): _____<br/> <input type="checkbox"/><sub>3</sub> From friends who inject drugs<br/> <input type="checkbox"/><sub>4</sub> From friends who do not inject drugs<br/> <input type="checkbox"/><sub>5</sub> From family<br/> <input type="checkbox"/><sub>77</sub> Other (Specify): _____<br/>           _____<br/>           _____<br/>           _____<br/>           _____<br/>           _____<br/>           _____ </div> <div><input type="checkbox"/><sub>88</sub> DNK <input type="checkbox"/><sub>99</sub> Refusal</div> |
| 3.5                                                           | Have you <u>ever</u> shared your syringe with other persons?                                                                         | <div> <input type="checkbox"/><sub>1</sub> No → 3.9<br/> <input type="checkbox"/><sub>2</sub> Yes </div> <div><input type="checkbox"/><sub>88</sub> DNK <input type="checkbox"/><sub>99</sub> Refusal</div>                                                                                                                                                                                                                                                                                                                                                                                                                                                                                                     |
| 3.6                                                           | In the last 6 months, how often have you shared your syringe?                                                                        | <div> <input type="checkbox"/><sub>1</sub> All the time<br/> <input type="checkbox"/><sub>2</sub> Almost all the time<br/> <input type="checkbox"/><sub>3</sub> Sometimes<br/> <input type="checkbox"/><sub>4</sub> Almost never<br/> <input type="checkbox"/><sub>5</sub> Never → 3.9 </div> <div><input type="checkbox"/><sub>88</sub> DNK <input type="checkbox"/><sub>99</sub> Refusal</div>                                                                                                                                                                                                                                                                                                                |
| 3.7                                                           | Do you usually clean your syringes before sharing them?                                                                              | <div> <input type="checkbox"/><sub>1</sub> No → 3.9<br/> <input type="checkbox"/><sub>2</sub> Yes </div> <div><input type="checkbox"/><sub>88</sub> DNK <input type="checkbox"/><sub>99</sub> Refusal</div>                                                                                                                                                                                                                                                                                                                                                                                                                                                                                                     |

|      |                                                                                                            |                                                                                                                                                                                                                                                                                                                                                  |                                                                                           |
|------|------------------------------------------------------------------------------------------------------------|--------------------------------------------------------------------------------------------------------------------------------------------------------------------------------------------------------------------------------------------------------------------------------------------------------------------------------------------------|-------------------------------------------------------------------------------------------|
| 3.8  | Which products do you use to clean your syringes when you share them?<br><b>(Several answers possible)</b> | <input type="checkbox"/> <sub>1</sub> Water<br><input type="checkbox"/> <sub>2</sub> Bleach<br><input type="checkbox"/> <sub>3</sub> Boiling<br><input type="checkbox"/> <sub>4</sub> Disinfectants<br><input type="checkbox"/> <sub>5</sub> Burning<br><input type="checkbox"/> <sub>77</sub> Other (Specify): _____<br>_____<br>_____<br>_____ | <input type="checkbox"/> <sub>88</sub> DNK <input type="checkbox"/> <sub>99</sub> Refusal |
| 3.9  | Have you <u>ever</u> shared your injecting material (containers, water, filter...) with other persons?     | <input type="checkbox"/> <sub>1</sub> No → 3.11<br><input type="checkbox"/> <sub>2</sub> Yes                                                                                                                                                                                                                                                     | <input type="checkbox"/> <sub>88</sub> DNK <input type="checkbox"/> <sub>99</sub> Refusal |
| 3.10 | In the last 6 months, how often have you shared your injecting material (containers, water, filter...)?    | <input type="checkbox"/> <sub>1</sub> All the time<br><input type="checkbox"/> <sub>2</sub> Almost all the time<br><input type="checkbox"/> <sub>3</sub> Sometimes<br><input type="checkbox"/> <sub>4</sub> Almost never<br><input type="checkbox"/> <sub>5</sub> Never                                                                          | <input type="checkbox"/> <sub>88</sub> DNK <input type="checkbox"/> <sub>99</sub> Refusal |
| 3.11 | Have you <u>ever</u> reused your own syringe?                                                              | <input type="checkbox"/> <sub>1</sub> No → 3.15<br><input type="checkbox"/> <sub>2</sub> Yes                                                                                                                                                                                                                                                     | <input type="checkbox"/> <sub>88</sub> DNK <input type="checkbox"/> <sub>99</sub> Refusal |
| 3.12 | <u>In the last 6 months</u> , how often did you reuse your own syringe?                                    | <input type="checkbox"/> <sub>1</sub> All the time<br><input type="checkbox"/> <sub>2</sub> Almost all the time<br><input type="checkbox"/> <sub>3</sub> Sometimes<br><input type="checkbox"/> <sub>4</sub> Almost never<br><input type="checkbox"/> <sub>5</sub> Never → 3.15                                                                   | <input type="checkbox"/> <sub>88</sub> DNK <input type="checkbox"/> <sub>99</sub> Refusal |
| 3.13 | Do you usually clean your syringes before reusing them?                                                    | <input type="checkbox"/> <sub>1</sub> No → 3.15<br><input type="checkbox"/> <sub>2</sub> Yes                                                                                                                                                                                                                                                     | <input type="checkbox"/> <sub>88</sub> DNK <input type="checkbox"/> <sub>99</sub> Refusal |
| 3.14 | Which products do you use to clean your syringes when you reuse them?<br><b>(Several answers possible)</b> | <input type="checkbox"/> <sub>1</sub> Water<br><input type="checkbox"/> <sub>2</sub> Bleach<br><input type="checkbox"/> <sub>3</sub> Boiling<br><input type="checkbox"/> <sub>4</sub> Disinfectants<br><input type="checkbox"/> <sub>5</sub> Burning<br><input type="checkbox"/> <sub>77</sub> Other (Specify): _____<br>_____<br>_____<br>_____ | <input type="checkbox"/> <sub>88</sub> DNK <input type="checkbox"/> <sub>99</sub> Refusal |

|      |                                                                                       |                                                                                                                                                 |                                                                                           |
|------|---------------------------------------------------------------------------------------|-------------------------------------------------------------------------------------------------------------------------------------------------|-------------------------------------------------------------------------------------------|
| 3.15 | The last time you injected drugs, did you use a new needle and syringe?               | <input type="checkbox"/> <sub>1</sub> No<br><input type="checkbox"/> <sub>2</sub> Yes<br><input type="checkbox"/> <sub>3</sub> I don't remember | <input type="checkbox"/> <sub>88</sub> DNK <input type="checkbox"/> <sub>99</sub> Refusal |
| 3.16 | Have you ever experienced an overdose (exceeding the limit of the usual drug amount)? | <input type="checkbox"/> <sub>1</sub> No<br><input type="checkbox"/> <sub>2</sub> Yes                                                           | <input type="checkbox"/> <sub>88</sub> DNK <input type="checkbox"/> <sub>99</sub> Refusal |

| SECTION 4 SEXUAL RISK BEHAVIORS AND OTHER RISK FACTORS                                                                                                                                                                                    |                                                    |                                                                                                                                                                                                                                                                                                                    |                                                                                           |
|-------------------------------------------------------------------------------------------------------------------------------------------------------------------------------------------------------------------------------------------|----------------------------------------------------|--------------------------------------------------------------------------------------------------------------------------------------------------------------------------------------------------------------------------------------------------------------------------------------------------------------------|-------------------------------------------------------------------------------------------|
| "Now I am going to ask you some questions about your sexual behavior and tattoo experience. I remind you again that all your responses are completely confidential, and that you can ask to skip a question if you prefer not to answer." |                                                    |                                                                                                                                                                                                                                                                                                                    |                                                                                           |
| 4.1                                                                                                                                                                                                                                       | Have you ever had sex?                             | <input type="checkbox"/> <sub>1</sub> No → 4.6<br><input type="checkbox"/> <sub>2</sub> Yes                                                                                                                                                                                                                        | <input type="checkbox"/> <sub>88</sub> DNK <input type="checkbox"/> <sub>99</sub> Refusal |
| 4.2                                                                                                                                                                                                                                       | Have you ever received money in exchange of sex?   | <input type="checkbox"/> <sub>1</sub> No → 4.4<br><input type="checkbox"/> <sub>2</sub> Yes                                                                                                                                                                                                                        | <input type="checkbox"/> <sub>88</sub> DNK <input type="checkbox"/> <sub>99</sub> Refusal |
| 4.3                                                                                                                                                                                                                                       | Is sex work your main source of income?            | <input type="checkbox"/> <sub>1</sub> No<br><input type="checkbox"/> <sub>2</sub> Yes                                                                                                                                                                                                                              | <input type="checkbox"/> <sub>88</sub> DNK <input type="checkbox"/> <sub>99</sub> Refusal |
| 4.4                                                                                                                                                                                                                                       | Have you ever received drug in exchange of sex?    | <input type="checkbox"/> <sub>1</sub> No<br><input type="checkbox"/> <sub>2</sub> Yes                                                                                                                                                                                                                              | <input type="checkbox"/> <sub>88</sub> DNK <input type="checkbox"/> <sub>99</sub> Refusal |
| 4.5                                                                                                                                                                                                                                       | Have you ever had sex with a same-sex partner?     | <input type="checkbox"/> <sub>1</sub> No<br><input type="checkbox"/> <sub>2</sub> Yes                                                                                                                                                                                                                              | <input type="checkbox"/> <sub>88</sub> DNK <input type="checkbox"/> <sub>99</sub> Refusal |
| 4.6                                                                                                                                                                                                                                       | Do you have any tattoo or piercing?                | <input type="checkbox"/> <sub>1</sub> No → Section 5<br><input type="checkbox"/> <sub>2</sub> Yes                                                                                                                                                                                                                  | <input type="checkbox"/> <sub>88</sub> DNK <input type="checkbox"/> <sub>99</sub> Refusal |
| 4.7                                                                                                                                                                                                                                       | Where did you do it?<br>(Several answers possible) | <input type="checkbox"/> <sub>1</sub> Professional tattoo parlor<br><input type="checkbox"/> <sub>2</sub> Temple<br><input type="checkbox"/> <sub>3</sub> Prison<br><input type="checkbox"/> <sub>4</sub> With friends<br><input type="checkbox"/> <sub>77</sub> Other (Specify): _____<br>_____<br>_____<br>_____ | <input type="checkbox"/> <sub>88</sub> DNK <input type="checkbox"/> <sub>99</sub> Refusal |

## SECTION 5 HCV KNOWLEDGE AND TESTING

"Now, I am going to ask you some questions about hepatitis C infection.

If you want to know more about hepatitis C, you can ask questions at the end of the interview and we'll give you a brochure with information on the disease.

If you want to be tested for hepatitis C virus infection, we can refer you to a free testing facility at the end of the interview."

|     |                                                                                                                                                            |                                                                                                                                                                                                                                                                |                                                                                           |
|-----|------------------------------------------------------------------------------------------------------------------------------------------------------------|----------------------------------------------------------------------------------------------------------------------------------------------------------------------------------------------------------------------------------------------------------------|-------------------------------------------------------------------------------------------|
| 5.1 | Have you ever heard of the hepatitis C virus before this interview?                                                                                        | <input type="checkbox"/> <sub>1</sub> No → Section 6<br><input type="checkbox"/> <sub>2</sub> Yes                                                                                                                                                              | <input type="checkbox"/> <sub>88</sub> DNK <input type="checkbox"/> <sub>99</sub> Refusal |
| 5.2 | Can you tell the symptoms of the hepatitis C virus infection?<br><b>(Write all the answers in the order they were mentioned)</b>                           | <hr/> <hr/> <hr/> <hr/> <hr/> <hr/> <hr/> <hr/>                                                                                                                                                                                                                | <input type="checkbox"/> <sub>88</sub> DNK <input type="checkbox"/> <sub>99</sub> Refusal |
| 5.3 | In your opinion, can people be infected with Hepatitis C without having any symptoms?                                                                      | <input type="checkbox"/> <sub>1</sub> No<br><input type="checkbox"/> <sub>2</sub> Yes                                                                                                                                                                          | <input type="checkbox"/> <sub>88</sub> DNK <input type="checkbox"/> <sub>99</sub> Refusal |
| 5.4 | Can you tell what you think is the main route of transmission of the hepatitis C virus?<br><b>(Write all the answers in the order they were mentioned)</b> | <hr/> <hr/> <hr/> <hr/> <hr/> <hr/> <hr/> <hr/>                                                                                                                                                                                                                | <input type="checkbox"/> <sub>88</sub> DNK <input type="checkbox"/> <sub>99</sub> Refusal |
| 5.5 | Have you ever had an HCV test?                                                                                                                             | <input type="checkbox"/> <sub>1</sub> No → Section 6<br><input type="checkbox"/> <sub>2</sub> Yes, in the last 12 months<br><input type="checkbox"/> <sub>3</sub> Yes, more than 12 months ago                                                                 | <input type="checkbox"/> <sub>88</sub> DNK <input type="checkbox"/> <sub>99</sub> Refusal |
| 5.6 | Where have you been tested for HCV?                                                                                                                        | <input type="checkbox"/> <sub>1</sub> Napneung project at AMS / CMU<br><input type="checkbox"/> <sub>77</sub> Other (Specify): _____<br><hr/> <hr/> <hr/> <hr/>                                                                                                | <input type="checkbox"/> <sub>88</sub> DNK <input type="checkbox"/> <sub>99</sub> Refusal |
| 5.7 | What was the result of your last test?                                                                                                                     | <input type="checkbox"/> <sub>1</sub> Positive<br><input type="checkbox"/> <sub>2</sub> Negative → Section 6<br><input type="checkbox"/> <sub>3</sub> Do not remember → Section 6<br><input type="checkbox"/> <sub>4</sub> Result not communicated → Section 6 | <input type="checkbox"/> <sub>88</sub> DNK <input type="checkbox"/> <sub>99</sub> Refusal |

|     |                               |                                                                                                                                   |                                                                                           |
|-----|-------------------------------|-----------------------------------------------------------------------------------------------------------------------------------|-------------------------------------------------------------------------------------------|
| 5.8 | Were you offered a treatment? | <input type="checkbox"/> <sub>1</sub> No<br><input type="checkbox"/> <sub>2</sub> Yes (Specify): _____<br>_____<br>_____<br>_____ | <input type="checkbox"/> <sub>88</sub> DNK <input type="checkbox"/> <sub>99</sub> Refusal |
|-----|-------------------------------|-----------------------------------------------------------------------------------------------------------------------------------|-------------------------------------------------------------------------------------------|

| SECTION 6 ACCESS TO HEALTH CARE                                                |                                                                                                                                             |                                                                                                                                                                                                                                                                                                                                                                                                                                                                                                                                                   |                                                                                           |
|--------------------------------------------------------------------------------|---------------------------------------------------------------------------------------------------------------------------------------------|---------------------------------------------------------------------------------------------------------------------------------------------------------------------------------------------------------------------------------------------------------------------------------------------------------------------------------------------------------------------------------------------------------------------------------------------------------------------------------------------------------------------------------------------------|-------------------------------------------------------------------------------------------|
| "I will now ask you some questions about your access to health care services." |                                                                                                                                             |                                                                                                                                                                                                                                                                                                                                                                                                                                                                                                                                                   |                                                                                           |
| 6.1                                                                            | Do you have a health insurance?                                                                                                             | <input type="checkbox"/> <sub>1</sub> No                      → 6.3<br><input type="checkbox"/> <sub>2</sub> Yes                                                                                                                                                                                                                                                                                                                                                                                                                                  | <input type="checkbox"/> <sub>88</sub> DNK <input type="checkbox"/> <sub>99</sub> Refusal |
| 6.2                                                                            | What is your health coverage scheme?                                                                                                        | <input type="checkbox"/> <sub>1</sub> Universal health care<br><input type="checkbox"/> <sub>2</sub> Social Security Scheme<br><input type="checkbox"/> <sub>3</sub> CSMBS<br><input type="checkbox"/> <sub>4</sub> Private insurance<br><input type="checkbox"/> <sub>77</sub> Other (Specify): _____<br>_____<br>_____<br><input type="checkbox"/> <sub>88</sub> DNK <input type="checkbox"/> <sub>99</sub> Refusal                                                                                                                             |                                                                                           |
| 6.3                                                                            | Where do you usually go when you have a health issue?                                                                                       | <input type="checkbox"/> <sub>1</sub> Do not look for care (Specify why): _____<br>_____<br>_____<br>_____<br><input type="checkbox"/> <sub>2</sub> Local health station<br><input type="checkbox"/> <sub>3</sub> Public hospital<br><input type="checkbox"/> <sub>4</sub> Private hospital or clinic<br><input type="checkbox"/> <sub>5</sub> Traditional healer<br><input type="checkbox"/> <sub>77</sub> Other (Specify): _____<br>_____<br>_____<br><input type="checkbox"/> <sub>88</sub> DNK <input type="checkbox"/> <sub>99</sub> Refusal |                                                                                           |
| 6.4                                                                            | What kind of barriers to access health care have you ever experienced?<br><i>(Show the card with the answers, several answers possible)</i> | <input type="checkbox"/> <sub>1</sub> Fear of police<br><input type="checkbox"/> <sub>2</sub> Fear of stigma<br><input type="checkbox"/> <sub>3</sub> Too expensive<br><input type="checkbox"/> <sub>4</sub> Too far<br><input type="checkbox"/> <sub>5</sub> Fear of diagnosis<br><input type="checkbox"/> <sub>6</sub> None<br><input type="checkbox"/> <sub>77</sub> Other (Specify): _____<br>_____<br>_____<br>_____<br><input type="checkbox"/> <sub>88</sub> DNK <input type="checkbox"/> <sub>99</sub> Refusal                            |                                                                                           |

|      |                                                                                                          |                                                                                                                                                                                                                                                  |                                                                                           |
|------|----------------------------------------------------------------------------------------------------------|--------------------------------------------------------------------------------------------------------------------------------------------------------------------------------------------------------------------------------------------------|-------------------------------------------------------------------------------------------|
| 6.5  | Have you ever been refused medical care?                                                                 | <input type="checkbox"/> <sub>1</sub> No<br><input type="checkbox"/> <sub>2</sub> Yes                                                                                                                                                            | <input type="checkbox"/> <sub>88</sub> DNK <input type="checkbox"/> <sub>99</sub> Refusal |
| 6.6  | Have you ever experienced discriminatory attitudes in health care settings in relation to your drug use? | <input type="checkbox"/> <sub>1</sub> No<br><input type="checkbox"/> <sub>2</sub> Yes (Specify): _____<br>_____<br>_____<br>_____<br>_____                                                                                                       | <input type="checkbox"/> <sub>88</sub> DNK <input type="checkbox"/> <sub>99</sub> Refusal |
| 6.7  | Have you ever received care for drug addiction problems?                                                 | <input type="checkbox"/> <sub>1</sub> No                      → 6.10<br><input type="checkbox"/> <sub>2</sub> Yes                                                                                                                                | <input type="checkbox"/> <sub>88</sub> DNK <input type="checkbox"/> <sub>99</sub> Refusal |
| 6.8  | Are you or have you been on MMT?                                                                         | <input type="checkbox"/> <sub>1</sub> No<br><input type="checkbox"/> <sub>2</sub> Yes (Still receiving MMT: <input type="checkbox"/> <sub>1</sub> No <input type="checkbox"/> <sub>2</sub> Yes)                                                  | <input type="checkbox"/> <sub>88</sub> DNK <input type="checkbox"/> <sub>99</sub> Refusal |
| 6.9  | Have you ever been on <u>voluntary</u> drug rehabilitation?                                              | <input type="checkbox"/> <sub>1</sub> No<br><input type="checkbox"/> <sub>2</sub> Yes (Specify where for each time):<br>1 <sup>st</sup> time: _____<br>2 <sup>nd</sup> time: _____<br>3 <sup>rd</sup> time: _____<br>4 <sup>th</sup> time: _____ | <input type="checkbox"/> <sub>88</sub> DNK <input type="checkbox"/> <sub>99</sub> Refusal |
| 6.10 | Are you a member of a support group for drug users?                                                      | <input type="checkbox"/> <sub>1</sub> No<br><input type="checkbox"/> <sub>2</sub> Yes (Specify): _____                                                                                                                                           | <input type="checkbox"/> <sub>88</sub> DNK <input type="checkbox"/> <sub>99</sub> Refusal |
| 6.11 | Have you ever participated in a health survey targeting drug users?                                      | <input type="checkbox"/> <sub>1</sub> No<br><input type="checkbox"/> <sub>2</sub> Yes                                                                                                                                                            | <input type="checkbox"/> <sub>88</sub> DNK <input type="checkbox"/> <sub>99</sub> Refusal |

|                                                                                                      |                                                                                |                                                                                                                  |                                                                                           |
|------------------------------------------------------------------------------------------------------|--------------------------------------------------------------------------------|------------------------------------------------------------------------------------------------------------------|-------------------------------------------------------------------------------------------|
| <b>SECTION 7 CONTACT WITH THE POLICE/PRISON/CORRECTION AND SIMILAR FACILITIES</b>                    |                                                                                |                                                                                                                  |                                                                                           |
| "Now I am going to ask you about your contacts with the police and/or other representatives of law." |                                                                                |                                                                                                                  |                                                                                           |
| 7.1                                                                                                  | Have you <u>ever</u> been arrested by the police in relation to your drug use? | <input type="checkbox"/> <sub>1</sub> No<br><input type="checkbox"/> <sub>2</sub> Yes                            | <input type="checkbox"/> <sub>88</sub> DNK <input type="checkbox"/> <sub>99</sub> Refusal |
| 7.2                                                                                                  | Have you <u>ever</u> been in prison?                                           | <input type="checkbox"/> <sub>1</sub> No                      → 7.6<br><input type="checkbox"/> <sub>2</sub> Yes | <input type="checkbox"/> <sub>88</sub> DNK <input type="checkbox"/> <sub>99</sub> Refusal |

|     |                                                                              |                                                                                                                                                                                                                                                                                                                                                                   |
|-----|------------------------------------------------------------------------------|-------------------------------------------------------------------------------------------------------------------------------------------------------------------------------------------------------------------------------------------------------------------------------------------------------------------------------------------------------------------|
| 7.3 | Have you <u>ever</u> used drugs while in prison?                             | <input type="checkbox"/> <sub>1</sub> No → 7.6<br><input type="checkbox"/> <sub>2</sub> Yes<br><div style="text-align: right;"><input type="checkbox"/><sub>88</sub> DNK <input type="checkbox"/><sub>99</sub> Refusal</div>                                                                                                                                      |
| 7.4 | Have you <u>ever</u> injected drugs while in prison?                         | <input type="checkbox"/> <sub>1</sub> No → 7.6<br><input type="checkbox"/> <sub>2</sub> Yes<br><div style="text-align: right;"><input type="checkbox"/><sub>88</sub> DNK <input type="checkbox"/><sub>99</sub> Refusal</div>                                                                                                                                      |
| 7.5 | Have you shared syringes with other persons while in prison?                 | <input type="checkbox"/> <sub>1</sub> No<br><input type="checkbox"/> <sub>2</sub> Yes<br><div style="text-align: right;"><input type="checkbox"/><sub>88</sub> DNK <input type="checkbox"/><sub>99</sub> Refusal</div>                                                                                                                                            |
| 7.6 | Have you ever been in <u>compulsory</u> drug treatment?                      | <input type="checkbox"/> <sub>1</sub> No → Section 8<br><input type="checkbox"/> <sub>2</sub> Yes (Specify how many times): _____<br><div style="text-align: right;"><input type="checkbox"/><sub>88</sub> DNK <input type="checkbox"/><sub>99</sub> Refusal</div>                                                                                                |
| 7.7 | What was the compulsory drug treatment?<br><b>(Several answers possible)</b> | <input type="checkbox"/> <sub>1</sub> Inpatient<br><input type="checkbox"/> <sub>2</sub> Outpatient<br><input type="checkbox"/> <sub>3</sub> Military boot camp<br><input type="checkbox"/> <sub>77</sub> Other (Specify): _____<br><div style="text-align: right;"><input type="checkbox"/><sub>88</sub> DNK <input type="checkbox"/><sub>99</sub> Refusal</div> |

| SECTION 8 EXPECTATIONS OF HEALTH CARE SYSTEM |                                                                                                                                                      |                                                                                                                                                                                                                                                                                                                                                                                            |
|----------------------------------------------|------------------------------------------------------------------------------------------------------------------------------------------------------|--------------------------------------------------------------------------------------------------------------------------------------------------------------------------------------------------------------------------------------------------------------------------------------------------------------------------------------------------------------------------------------------|
| 8.1                                          | If you need information about health issues, where do you look for them?<br><b>(Show the card with the answers, several answers possible)</b>        | <input type="checkbox"/> <sub>1</sub> Ask health care professionals<br><input type="checkbox"/> <sub>2</sub> Ask friends<br><input type="checkbox"/> <sub>3</sub> Search on the internet<br><input type="checkbox"/> <sub>77</sub> Other (Specify): _____<br><div style="text-align: right;"><input type="checkbox"/><sub>88</sub> DNK <input type="checkbox"/><sub>99</sub> Refusal</div> |
| 8.2                                          | <b>(Skip this question in case the person already knows that she/he is infected with HCV)</b><br>Would you be interested in knowing your HCV status? | <input type="checkbox"/> <sub>1</sub> No (Specify why): _____<br><input type="checkbox"/> <sub>2</sub> Yes<br><div style="text-align: right;"><input type="checkbox"/><sub>88</sub> DNK <input type="checkbox"/><sub>99</sub> Refusal</div>                                                                                                                                                |
| 8.3                                          | If there was a new HCV treatment available in Thailand, would you like to be informed?                                                               | <input type="checkbox"/> <sub>1</sub> No → 8.5<br>(Specify why): _____<br><input type="checkbox"/> <sub>2</sub> Yes<br><div style="text-align: right;"><input type="checkbox"/><sub>88</sub> DNK <input type="checkbox"/><sub>99</sub> Refusal</div>                                                                                                                                       |

|     |                                                                                                                                      |                                                                                                                                                                                                                                                                                                                                                                                                                                                                                                                                              |
|-----|--------------------------------------------------------------------------------------------------------------------------------------|----------------------------------------------------------------------------------------------------------------------------------------------------------------------------------------------------------------------------------------------------------------------------------------------------------------------------------------------------------------------------------------------------------------------------------------------------------------------------------------------------------------------------------------------|
| 8.4 | What would be the best way to inform you?                                                                                            | <div> <input type="checkbox"/><sub>1</sub>    Poster/leaflet in a NGO         </div> <div> <input type="checkbox"/><sub>2</sub>    Website         </div> <div> <input type="checkbox"/><sub>3</sub>    Text messages         </div> <div> <input type="checkbox"/><sub>4</sub>    Telephone call         </div> <div> <input type="checkbox"/><sub>77</sub>    Other (Specify): _____<br/>         _____       </div> <div> <input type="checkbox"/><sub>88</sub> <i>DNK</i>    <input type="checkbox"/><sub>99</sub> <i>Refusal</i> </div> |
| 8.5 | What suggestions do you have to improve the governmental policies toward people who inject drugs?<br><i>(Write down all answers)</i> | <div>         _____<br/>         _____<br/>         _____<br/>         _____<br/>         _____<br/>         _____       </div> <div> <input type="checkbox"/><sub>88</sub> <i>DNK</i>    <input type="checkbox"/><sub>99</sub> <i>Refusal</i> </div>                                                                                                                                                                                                                                                                                        |

## SECTION 9 INTERVIEWEE'S FEEDBACK

|     |                                            |
|-----|--------------------------------------------|
| 9.1 | What is your opinion about this interview? |
|-----|--------------------------------------------|

**Usefulness:**

- ☐<sub>1</sub> Very useful
  - ☐<sub>2</sub> Useful
  - ☐<sub>3</sub> Ok
  - ☐<sub>4</sub> Not useful
  - ☐<sub>5</sub> Waste of time

**Embarrassing:**

- ☐<sub>1</sub> Not at all embarrassing
- ☐<sub>2</sub> Not embarrassing
- ☐<sub>3</sub> Ok
- ☐<sub>4</sub> Embarrassing
- ☐<sub>5</sub> Very embarrassing

**Duration:** \_\_\_\_\_

- ☐<sub>1</sub> Very short
  - ☐<sub>2</sub> Short
  - ☐<sub>3</sub> Ok
  - ☐<sub>4</sub> Long
  - ☐<sub>5</sub> Very Long

9.2 Do you have any comments about the questionnaire?

[illegible]

**"THANK YOU A LOT FOR TAKING PART IN THIS STUDY"**

| SECTION 10 INTERVIEWER'S EVALUATION                    |                                                                           |                                                                                                                                                                                                                                                                                                                                                                                                                                                                                                                                                                                                                   |
|--------------------------------------------------------|---------------------------------------------------------------------------|-------------------------------------------------------------------------------------------------------------------------------------------------------------------------------------------------------------------------------------------------------------------------------------------------------------------------------------------------------------------------------------------------------------------------------------------------------------------------------------------------------------------------------------------------------------------------------------------------------------------|
| To be completed once the interviewee has left the room |                                                                           |                                                                                                                                                                                                                                                                                                                                                                                                                                                                                                                                                                                                                   |
| 10.1                                                   | Time interview end                                                        | I _ _ H _ _ M                                                                                                                                                                                                                                                                                                                                                                                                                                                                                                                                                                                                     |
| 10.2                                                   | The interview was performed:                                              | <input type="checkbox"/> <sub>1</sub> Without any interruption<br><input type="checkbox"/> <sub>2</sub> The person showed signs that he/she wanted to stop the interview<br><input type="checkbox"/> <sub>3</sub> Was interrupted several times                                                                                                                                                                                                                                                                                                                                                                   |
| 10.3                                                   | Describe the person interviewed :<br><i>(Can be more than one answer)</i> | <input type="checkbox"/> <sub>1</sub> Has a visible physical problem or handicap<br><input type="checkbox"/> <sub>2</sub> Was relaxed<br><input type="checkbox"/> <sub>3</sub> Was OK<br><input type="checkbox"/> <sub>4</sub> Was very emotional<br><input type="checkbox"/> <sub>5</sub> Was watching at the time<br><input type="checkbox"/> <sub>6</sub> Had difficulty understanding<br><input type="checkbox"/> <sub>7</sub> Had difficulty expressing her/himself<br><input type="checkbox"/> <sub>8</sub> Had difficulty remembering events<br><input type="checkbox"/> <sub>9</sub> Was physically tired |
| 10.4                                                   | The answers seemed:                                                       | <input type="checkbox"/> <sub>1</sub> Very reliable<br><input type="checkbox"/> <sub>2</sub> Reliable<br><input type="checkbox"/> <sub>3</sub> Not reliable<br><input type="checkbox"/> <sub>4</sub> Not at all reliable<br><input type="checkbox"/> <sub>88</sub> Don't know                                                                                                                                                                                                                                                                                                                                     |
| 10.5                                                   | Comments:                                                                 | <div>-----</div>                                                                                                                                                                                                                                                                                                                                                    |
