# Supplementary material for: Risky injection practices and HCV awareness in Chiang Mai Province, Thailand: a respondent-driven sampling study of people who inject drugs
Source: Springer Nature journal article supplement (doi:10.1186/s12889-020-09549-w), 2020-09-24
Supplement: MOESM1 [file 18412746]

**Interviewer's notice:**

- Do not read answers.
- Show the question's corresponding card when mentioned.
- Ask for specifications when mentioned.
- Skip questions when mentioned.

**SECTION 1 SOCIAL DEMOGRAPHIC CHARACTERISTICS**

"I would like to start this interview by asking you questions about your personal background."

| No. | QUESTION                                                   | ANSWER                                                                                                                                                                                                                                                                                                                                                                                                                                                                                                                                                                                            |
|-----|------------------------------------------------------------|---------------------------------------------------------------------------------------------------------------------------------------------------------------------------------------------------------------------------------------------------------------------------------------------------------------------------------------------------------------------------------------------------------------------------------------------------------------------------------------------------------------------------------------------------------------------------------------------------|
| 1.1 | What is your gender?                                       | <input type="checkbox"/> <sub>1</sub> Male<br><input type="checkbox"/> <sub>2</sub> Female<br><input type="checkbox"/> <sub>3</sub> Transgender<br><div style="text-align: right;"><input type="checkbox"/><sub>88</sub> DNK <input type="checkbox"/><sub>99</sub> Refusal</div>                                                                                                                                                                                                                                                                                                                  |
| 1.2 | What year were you born?                                   | _ 2 _   5 _   _   _  <br><div style="text-align: right;"><input type="checkbox"/><sub>88</sub> DNK <input type="checkbox"/><sub>99</sub> Refusal</div>                                                                                                                                                                                                                                                                                                                                                                                                                                            |
| 1.3 | What is your ethnicity?                                    | -----<br><div style="text-align: right;"><input type="checkbox"/><sub>88</sub> DNK <input type="checkbox"/><sub>99</sub> Refusal</div>                                                                                                                                                                                                                                                                                                                                                                                                                                                            |
| 1.4 | Do you have the Thai citizenship?                          | <input type="checkbox"/> <sub>1</sub> No<br><input type="checkbox"/> <sub>2</sub> Yes (specify color of ID card): -----<br><div style="text-align: right;"><input type="checkbox"/><sub>88</sub> DNK <input type="checkbox"/><sub>99</sub> Refusal</div>                                                                                                                                                                                                                                                                                                                                          |
| 1.5 | What is your marital status?                               | <input type="checkbox"/> <sub>1</sub> Single (never married)<br><input type="checkbox"/> <sub>2</sub> Married<br><input type="checkbox"/> <sub>3</sub> In a relationship<br><input type="checkbox"/> <sub>4</sub> Widowed<br><input type="checkbox"/> <sub>5</sub> Divorced or separated<br><input type="checkbox"/> <sub>77</sub> Other (Specify): -----<br>-----<br><div style="text-align: right;"><input type="checkbox"/><sub>88</sub> DNK <input type="checkbox"/><sub>99</sub> Refusal</div>                                                                                               |
| 1.6 | Do you have children or relatives that you are supporting? | <input type="checkbox"/> <sub>1</sub> No<br><input type="checkbox"/> <sub>2</sub> Yes (Specify): -----<br><div style="text-align: right;"><input type="checkbox"/><sub>88</sub> DNK <input type="checkbox"/><sub>99</sub> Refusal</div>                                                                                                                                                                                                                                                                                                                                                           |
| 1.7 | What is your highest education level?                      | <input type="checkbox"/> <sub>1</sub> I didn't go to school<br><input type="checkbox"/> <sub>2</sub> I didn't finish primary school<br><input type="checkbox"/> <sub>3</sub> Primary school<br><input type="checkbox"/> <sub>4</sub> Secondary school<br><input type="checkbox"/> <sub>5</sub> Some vocational, teacher training<br><input type="checkbox"/> <sub>6</sub> College or university<br><input type="checkbox"/> <sub>77</sub> Other (Specify): -----<br><div style="text-align: right;"><input type="checkbox"/><sub>88</sub> DNK <input type="checkbox"/><sub>99</sub> Refusal</div> |
| 1.8 | Which language do you feel most comfortable using?         | Language -----<br><div style="text-align: right;"><input type="checkbox"/><sub>88</sub> DNK <input type="checkbox"/><sub>99</sub> Refusal</div>                                                                                                                                                                                                                                                                                                                                                                                                                                                   |

|      |                                                                                                           |                                                                                                                                                                                                                                                                                                                                                                                                                                                                                                                                                                                                                                                                                                                                                                                                                                                                                              |
|------|-----------------------------------------------------------------------------------------------------------|----------------------------------------------------------------------------------------------------------------------------------------------------------------------------------------------------------------------------------------------------------------------------------------------------------------------------------------------------------------------------------------------------------------------------------------------------------------------------------------------------------------------------------------------------------------------------------------------------------------------------------------------------------------------------------------------------------------------------------------------------------------------------------------------------------------------------------------------------------------------------------------------|
| 1.9  | What is your Thai language ability?<br>a) Understand<br>b) Speak<br>c) Read<br>d) Write                   | <input type="checkbox"/> <sub>1</sub> 😊 <input type="checkbox"/> <sub>2</sub> 😐 <input type="checkbox"/> <sub>3</sub> 😞<br><input type="checkbox"/> <sub>1</sub> 😊 <input type="checkbox"/> <sub>2</sub> 😐 <input type="checkbox"/> <sub>3</sub> 😞<br><input type="checkbox"/> <sub>1</sub> 😊 <input type="checkbox"/> <sub>2</sub> 😐 <input type="checkbox"/> <sub>3</sub> 😞<br><input type="checkbox"/> <sub>1</sub> 😊 <input type="checkbox"/> <sub>2</sub> 😐 <input type="checkbox"/> <sub>3</sub> 😞<br><input type="checkbox"/> <sub>88</sub> DNK <input type="checkbox"/> <sub>99</sub> Refusal<br><input type="checkbox"/> <sub>88</sub> DNK <input type="checkbox"/> <sub>99</sub> Refusal<br><input type="checkbox"/> <sub>88</sub> DNK <input type="checkbox"/> <sub>99</sub> Refusal<br><input type="checkbox"/> <sub>88</sub> DNK <input type="checkbox"/> <sub>99</sub> Refusal |
| 1.10 | What are your current living circumstances (in the last month)?                                           | <input type="checkbox"/> <sub>1</sub> In your own place<br><input type="checkbox"/> <sub>2</sub> At your family's place<br><input type="checkbox"/> <sub>3</sub> At a friend's place<br><input type="checkbox"/> <sub>4</sub> In an institution<br><input type="checkbox"/> <sub>5</sub> In daily rental place<br><input type="checkbox"/> <sub>6</sub> On the street<br><input type="checkbox"/> <sub>77</sub> Other (Specify): _____<br>_____<br>_____<br><input type="checkbox"/> <sub>88</sub> DNK <input type="checkbox"/> <sub>99</sub> Refusal                                                                                                                                                                                                                                                                                                                                        |
| 1.11 | In the place(s) you are currently staying, is there:<br>a) Piped water?<br>b) Electricity?<br>c) Toilets? | <input type="checkbox"/> <sub>1</sub> No <input type="checkbox"/> <sub>2</sub> Yes<br><input type="checkbox"/> <sub>1</sub> No <input type="checkbox"/> <sub>2</sub> Yes<br><input type="checkbox"/> <sub>1</sub> No <input type="checkbox"/> <sub>2</sub> Yes<br><input type="checkbox"/> <sub>88</sub> DNK <input type="checkbox"/> <sub>99</sub> Refusal<br><input type="checkbox"/> <sub>88</sub> DNK <input type="checkbox"/> <sub>99</sub> Refusal<br><input type="checkbox"/> <sub>88</sub> DNK <input type="checkbox"/> <sub>99</sub> Refusal                                                                                                                                                                                                                                                                                                                                        |
| 1.12 | Do you have access to internet?                                                                           | <input type="checkbox"/> <sub>1</sub> No <input type="checkbox"/> <sub>2</sub> Yes<br>→ 1.14<br><input type="checkbox"/> <sub>88</sub> DNK <input type="checkbox"/> <sub>99</sub> Refusal                                                                                                                                                                                                                                                                                                                                                                                                                                                                                                                                                                                                                                                                                                    |
| 1.13 | Where do you connect to the internet usually?<br><i>(Show the card, several answers possible)</i>         | <input type="checkbox"/> <sub>1</sub> Own computer<br><input type="checkbox"/> <sub>2</sub> Own mobile phone<br><input type="checkbox"/> <sub>3</sub> Friend's computer<br><input type="checkbox"/> <sub>4</sub> Friend's mobile phone<br><input type="checkbox"/> <sub>5</sub> Internet café<br><input type="checkbox"/> <sub>77</sub> Other (Specify): _____<br>_____<br>_____<br><input type="checkbox"/> <sub>88</sub> DNK <input type="checkbox"/> <sub>99</sub> Refusal                                                                                                                                                                                                                                                                                                                                                                                                                |
| 1.14 | What is your current working status?                                                                      | <input type="checkbox"/> <sub>1</sub> Permanent wage work<br><input type="checkbox"/> <sub>2</sub> Government employee<br><input type="checkbox"/> <sub>3</sub> Day labor<br><input type="checkbox"/> <sub>4</sub> Student<br><input type="checkbox"/> <sub>5</sub> Unemployed<br><input type="checkbox"/> <sub>6</sub> Unable to work<br><input type="checkbox"/> <sub>77</sub> Other (Specify): _____<br>_____<br>_____<br><input type="checkbox"/> <sub>88</sub> DNK <input type="checkbox"/> <sub>99</sub> Refusal                                                                                                                                                                                                                                                                                                                                                                       |
| 1.15 | Do you have a regular income?                                                                             | <input type="checkbox"/> <sub>1</sub> No<br><input type="checkbox"/> <sub>2</sub> Yes<br><input type="checkbox"/> <sub>88</sub> DNK <input type="checkbox"/> <sub>99</sub> Refusal                                                                                                                                                                                                                                                                                                                                                                                                                                                                                                                                                                                                                                                                                                           |

|      |                                                                            |                                                                                                                                                                                                                                                                                                                                                                                                                                                                                                                                                                                                                                                                      |
|------|----------------------------------------------------------------------------|----------------------------------------------------------------------------------------------------------------------------------------------------------------------------------------------------------------------------------------------------------------------------------------------------------------------------------------------------------------------------------------------------------------------------------------------------------------------------------------------------------------------------------------------------------------------------------------------------------------------------------------------------------------------|
| 1.16 | What are your main sources of income?<br><i>(Several answers possible)</i> | <input type="checkbox"/> <sub>1</sub> Employment<br><input type="checkbox"/> <sub>2</sub> Daily wages<br><input type="checkbox"/> <sub>3</sub> Support from NGOs<br><input type="checkbox"/> <sub>4</sub> Support from government<br><input type="checkbox"/> <sub>5</sub> Support from family<br><input type="checkbox"/> <sub>6</sub> Selling things<br><input type="checkbox"/> <sub>7</sub> Selling sex<br><input type="checkbox"/> <sub>8</sub> None<br><input type="checkbox"/> <sub>77</sub> Other (Specify): _____<br>_____<br><div style="text-align: right;"><input type="checkbox"/><sub>88</sub> DNK <input type="checkbox"/><sub>99</sub> Refusal</div> |
| 1.17 | What is your income approximately?                                         | _____ Baht<br><input type="checkbox"/> <sub>1</sub> Per day<br><input type="checkbox"/> <sub>2</sub> Per week<br><input type="checkbox"/> <sub>3</sub> Per month<br><div style="text-align: right;"><input type="checkbox"/><sub>88</sub> DNK <input type="checkbox"/><sub>99</sub> Refusal</div>                                                                                                                                                                                                                                                                                                                                                                    |

**SECTION 2 DRUG USE**

“The next questions are related to the practice of using drugs.”

|                                                                                          |                                                                                                                                                                 |                                                                                                                                                                 |                                                                                                                                                                 |                                                                                                                                                                 |                                                                                                                                                                 |                                                                                                                                                                 |                                                                                                                                                                 |                                                                                                                                                                 |                                                                                                                                                                 |                                                                                                                                                                 |                                                                                                                                                                 |                                                                        |
|------------------------------------------------------------------------------------------|-----------------------------------------------------------------------------------------------------------------------------------------------------------------|-----------------------------------------------------------------------------------------------------------------------------------------------------------------|-----------------------------------------------------------------------------------------------------------------------------------------------------------------|-----------------------------------------------------------------------------------------------------------------------------------------------------------------|-----------------------------------------------------------------------------------------------------------------------------------------------------------------|-----------------------------------------------------------------------------------------------------------------------------------------------------------------|-----------------------------------------------------------------------------------------------------------------------------------------------------------------|-----------------------------------------------------------------------------------------------------------------------------------------------------------------|-----------------------------------------------------------------------------------------------------------------------------------------------------------------|-----------------------------------------------------------------------------------------------------------------------------------------------------------------|-----------------------------------------------------------------------------------------------------------------------------------------------------------------|------------------------------------------------------------------------|
| 2.1 Which drugs have you used in the last 6 months?<br><i>(Several answers possible)</i> | Heroin                                                                                                                                                          | Opium                                                                                                                                                           | Methadone                                                                                                                                                       | Ya-Ba                                                                                                                                                           | Ice                                                                                                                                                             | Midazolam/<br>sleeping pill                                                                                                                                     | Cannabis                                                                                                                                                        | Glue                                                                                                                                                            | Cocaine                                                                                                                                                         | Ecstasy                                                                                                                                                         | Alcohol                                                                                                                                                         | Other<br>(Specify):<br>-----<br>-----<br>-----                         |
|                                                                                          | <input type="checkbox"/> <sub>1</sub> No<br><input type="checkbox"/> <sub>2</sub> Yes<br><input type="checkbox"/> 88 DNK<br><input type="checkbox"/> 99 Refusal | <input type="checkbox"/> <sub>1</sub> No<br><input type="checkbox"/> <sub>2</sub> Yes<br><input type="checkbox"/> 88 DNK<br><input type="checkbox"/> 99 Refusal | <input type="checkbox"/> <sub>1</sub> No<br><input type="checkbox"/> <sub>2</sub> Yes<br><input type="checkbox"/> 88 DNK<br><input type="checkbox"/> 99 Refusal | <input type="checkbox"/> <sub>1</sub> No<br><input type="checkbox"/> <sub>2</sub> Yes<br><input type="checkbox"/> 88 DNK<br><input type="checkbox"/> 99 Refusal | <input type="checkbox"/> <sub>1</sub> No<br><input type="checkbox"/> <sub>2</sub> Yes<br><input type="checkbox"/> 88 DNK<br><input type="checkbox"/> 99 Refusal | <input type="checkbox"/> <sub>1</sub> No<br><input type="checkbox"/> <sub>2</sub> Yes<br><input type="checkbox"/> 88 DNK<br><input type="checkbox"/> 99 Refusal | <input type="checkbox"/> <sub>1</sub> No<br><input type="checkbox"/> <sub>2</sub> Yes<br><input type="checkbox"/> 88 DNK<br><input type="checkbox"/> 99 Refusal | <input type="checkbox"/> <sub>1</sub> No<br><input type="checkbox"/> <sub>2</sub> Yes<br><input type="checkbox"/> 88 DNK<br><input type="checkbox"/> 99 Refusal | <input type="checkbox"/> <sub>1</sub> No<br><input type="checkbox"/> <sub>2</sub> Yes<br><input type="checkbox"/> 88 DNK<br><input type="checkbox"/> 99 Refusal | <input type="checkbox"/> <sub>1</sub> No<br><input type="checkbox"/> <sub>2</sub> Yes<br><input type="checkbox"/> 88 DNK<br><input type="checkbox"/> 99 Refusal | <input type="checkbox"/> <sub>1</sub> No<br><input type="checkbox"/> <sub>2</sub> Yes<br><input type="checkbox"/> 88 DNK<br><input type="checkbox"/> 99 Refusal | <input type="checkbox"/> 88 DNK<br><input type="checkbox"/> 99 Refusal |

*(For each drug used in the last 6 months, ask the questions below in a vertical order)*

|                                                    |                                                                                                                 |                                                                                                                 |                                                                                                                 |                                                                                                                 |                                                                                                                 |                                                                                                                 |                                                                                                                 |                                                                                                                 |                                                                                                                 |                                                                                                                 |                                                                                                                 |                                                                                                                 |
|----------------------------------------------------|-----------------------------------------------------------------------------------------------------------------|-----------------------------------------------------------------------------------------------------------------|-----------------------------------------------------------------------------------------------------------------|-----------------------------------------------------------------------------------------------------------------|-----------------------------------------------------------------------------------------------------------------|-----------------------------------------------------------------------------------------------------------------|-----------------------------------------------------------------------------------------------------------------|-----------------------------------------------------------------------------------------------------------------|-----------------------------------------------------------------------------------------------------------------|-----------------------------------------------------------------------------------------------------------------|-----------------------------------------------------------------------------------------------------------------|-----------------------------------------------------------------------------------------------------------------|
| 2.2 How often did you use it?                      | ↓                                                                                                               | ↓                                                                                                               | ↓                                                                                                               | ↓                                                                                                               | ↓                                                                                                               | ↓                                                                                                               | ↓                                                                                                               | ↓                                                                                                               | ↓                                                                                                               | ↓                                                                                                               | ↓                                                                                                               | ↓                                                                                                               |
| 1) One or several times per day                    | <input type="checkbox"/> <sub>1</sub>                                                                           | <input type="checkbox"/> <sub>1</sub>                                                                           | <input type="checkbox"/> <sub>1</sub>                                                                           | <input type="checkbox"/> <sub>1</sub>                                                                           | <input type="checkbox"/> <sub>1</sub>                                                                           | <input type="checkbox"/> <sub>1</sub>                                                                           | <input type="checkbox"/> <sub>1</sub>                                                                           | <input type="checkbox"/> <sub>1</sub>                                                                           | <input type="checkbox"/> <sub>1</sub>                                                                           | <input type="checkbox"/> <sub>1</sub>                                                                           | <input type="checkbox"/> <sub>1</sub>                                                                           | <input type="checkbox"/> <sub>1</sub>                                                                           |
| 2) One or several times per week but not every day | <input type="checkbox"/> <sub>2</sub>                                                                           | <input type="checkbox"/> <sub>2</sub>                                                                           | <input type="checkbox"/> <sub>2</sub>                                                                           | <input type="checkbox"/> <sub>2</sub>                                                                           | <input type="checkbox"/> <sub>2</sub>                                                                           | <input type="checkbox"/> <sub>2</sub>                                                                           | <input type="checkbox"/> <sub>2</sub>                                                                           | <input type="checkbox"/> <sub>2</sub>                                                                           | <input type="checkbox"/> <sub>2</sub>                                                                           | <input type="checkbox"/> <sub>2</sub>                                                                           | <input type="checkbox"/> <sub>2</sub>                                                                           | <input type="checkbox"/> <sub>2</sub>                                                                           |
| 3) Several times per month but not every week      | <input type="checkbox"/> <sub>3</sub>                                                                           | <input type="checkbox"/> <sub>3</sub>                                                                           | <input type="checkbox"/> <sub>3</sub>                                                                           | <input type="checkbox"/> <sub>3</sub>                                                                           | <input type="checkbox"/> <sub>3</sub>                                                                           | <input type="checkbox"/> <sub>3</sub>                                                                           | <input type="checkbox"/> <sub>3</sub>                                                                           | <input type="checkbox"/> <sub>3</sub>                                                                           | <input type="checkbox"/> <sub>3</sub>                                                                           | <input type="checkbox"/> <sub>3</sub>                                                                           | <input type="checkbox"/> <sub>3</sub>                                                                           | <input type="checkbox"/> <sub>3</sub>                                                                           |
| 4) Less than that                                  | <input type="checkbox"/> <sub>4</sub><br><input type="checkbox"/> 88 DNK<br><input type="checkbox"/> 99 Refusal | <input type="checkbox"/> <sub>4</sub><br><input type="checkbox"/> 88 DNK<br><input type="checkbox"/> 99 Refusal | <input type="checkbox"/> <sub>4</sub><br><input type="checkbox"/> 88 DNK<br><input type="checkbox"/> 99 Refusal | <input type="checkbox"/> <sub>4</sub><br><input type="checkbox"/> 88 DNK<br><input type="checkbox"/> 99 Refusal | <input type="checkbox"/> <sub>4</sub><br><input type="checkbox"/> 88 DNK<br><input type="checkbox"/> 99 Refusal | <input type="checkbox"/> <sub>4</sub><br><input type="checkbox"/> 88 DNK<br><input type="checkbox"/> 99 Refusal | <input type="checkbox"/> <sub>4</sub><br><input type="checkbox"/> 88 DNK<br><input type="checkbox"/> 99 Refusal | <input type="checkbox"/> <sub>4</sub><br><input type="checkbox"/> 88 DNK<br><input type="checkbox"/> 99 Refusal | <input type="checkbox"/> <sub>4</sub><br><input type="checkbox"/> 88 DNK<br><input type="checkbox"/> 99 Refusal | <input type="checkbox"/> <sub>4</sub><br><input type="checkbox"/> 88 DNK<br><input type="checkbox"/> 99 Refusal | <input type="checkbox"/> <sub>4</sub><br><input type="checkbox"/> 88 DNK<br><input type="checkbox"/> 99 Refusal | <input type="checkbox"/> <sub>4</sub><br><input type="checkbox"/> 88 DNK<br><input type="checkbox"/> 99 Refusal |

|                                                                    |                                                                                                                 |                                                                                                                 |                                                                                                                 |                                                                                                                 |                                                                                                                 |                                                                                                                 |                                                                                                                 |                                                                                                                 |                                                                                                                 |                                                                                                                 |                                                                                                                 |                                                                                                                 |
|--------------------------------------------------------------------|-----------------------------------------------------------------------------------------------------------------|-----------------------------------------------------------------------------------------------------------------|-----------------------------------------------------------------------------------------------------------------|-----------------------------------------------------------------------------------------------------------------|-----------------------------------------------------------------------------------------------------------------|-----------------------------------------------------------------------------------------------------------------|-----------------------------------------------------------------------------------------------------------------|-----------------------------------------------------------------------------------------------------------------|-----------------------------------------------------------------------------------------------------------------|-----------------------------------------------------------------------------------------------------------------|-----------------------------------------------------------------------------------------------------------------|-----------------------------------------------------------------------------------------------------------------|
| 2.3 How do you currently use it? <i>(Several answers possible)</i> |                                                                                                                 |                                                                                                                 |                                                                                                                 |                                                                                                                 |                                                                                                                 |                                                                                                                 |                                                                                                                 |                                                                                                                 |                                                                                                                 |                                                                                                                 |                                                                                                                 |                                                                                                                 |
| 1) Oral                                                            | <input type="checkbox"/> <sub>1</sub>                                                                           | <input type="checkbox"/> <sub>1</sub>                                                                           | <input type="checkbox"/> <sub>1</sub>                                                                           | <input type="checkbox"/> <sub>1</sub>                                                                           | <input type="checkbox"/> <sub>1</sub>                                                                           | <input type="checkbox"/> <sub>1</sub>                                                                           | <input type="checkbox"/> <sub>1</sub>                                                                           | <input type="checkbox"/> <sub>1</sub>                                                                           | <input type="checkbox"/> <sub>1</sub>                                                                           | <input type="checkbox"/> <sub>1</sub>                                                                           | <input type="checkbox"/> <sub>1</sub>                                                                           | <input type="checkbox"/> <sub>1</sub>                                                                           |
| 2) Sniffed                                                         | <input type="checkbox"/> <sub>2</sub>                                                                           | <input type="checkbox"/> <sub>2</sub>                                                                           | <input type="checkbox"/> <sub>2</sub>                                                                           | <input type="checkbox"/> <sub>2</sub>                                                                           | <input type="checkbox"/> <sub>2</sub>                                                                           | <input type="checkbox"/> <sub>2</sub>                                                                           | <input type="checkbox"/> <sub>2</sub>                                                                           | <input type="checkbox"/> <sub>2</sub>                                                                           | <input type="checkbox"/> <sub>2</sub>                                                                           | <input type="checkbox"/> <sub>2</sub>                                                                           | <input type="checkbox"/> <sub>2</sub>                                                                           | <input type="checkbox"/> <sub>2</sub>                                                                           |
| 3) Smoked                                                          | <input type="checkbox"/> <sub>3</sub>                                                                           | <input type="checkbox"/> <sub>3</sub>                                                                           | <input type="checkbox"/> <sub>3</sub>                                                                           | <input type="checkbox"/> <sub>3</sub>                                                                           | <input type="checkbox"/> <sub>3</sub>                                                                           | <input type="checkbox"/> <sub>3</sub>                                                                           | <input type="checkbox"/> <sub>3</sub>                                                                           | <input type="checkbox"/> <sub>3</sub>                                                                           | <input type="checkbox"/> <sub>3</sub>                                                                           | <input type="checkbox"/> <sub>3</sub>                                                                           | <input type="checkbox"/> <sub>3</sub>                                                                           | <input type="checkbox"/> <sub>3</sub>                                                                           |
| 4) Inhaled                                                         | <input type="checkbox"/> <sub>4</sub>                                                                           | <input type="checkbox"/> <sub>4</sub>                                                                           | <input type="checkbox"/> <sub>4</sub>                                                                           | <input type="checkbox"/> <sub>4</sub>                                                                           | <input type="checkbox"/> <sub>4</sub>                                                                           | <input type="checkbox"/> <sub>4</sub>                                                                           | <input type="checkbox"/> <sub>4</sub>                                                                           | <input type="checkbox"/> <sub>4</sub>                                                                           | <input type="checkbox"/> <sub>4</sub>                                                                           | <input type="checkbox"/> <sub>4</sub>                                                                           | <input type="checkbox"/> <sub>4</sub>                                                                           | <input type="checkbox"/> <sub>4</sub>                                                                           |
| 5) Injected                                                        | <input type="checkbox"/> <sub>5</sub><br><input type="checkbox"/> 88 DNK<br><input type="checkbox"/> 99 Refusal | <input type="checkbox"/> <sub>5</sub><br><input type="checkbox"/> 88 DNK<br><input type="checkbox"/> 99 Refusal | <input type="checkbox"/> <sub>5</sub><br><input type="checkbox"/> 88 DNK<br><input type="checkbox"/> 99 Refusal | <input type="checkbox"/> <sub>5</sub><br><input type="checkbox"/> 88 DNK<br><input type="checkbox"/> 99 Refusal | <input type="checkbox"/> <sub>5</sub><br><input type="checkbox"/> 88 DNK<br><input type="checkbox"/> 99 Refusal | <input type="checkbox"/> <sub>5</sub><br><input type="checkbox"/> 88 DNK<br><input type="checkbox"/> 99 Refusal | <input type="checkbox"/> <sub>5</sub><br><input type="checkbox"/> 88 DNK<br><input type="checkbox"/> 99 Refusal | <input type="checkbox"/> <sub>5</sub><br><input type="checkbox"/> 88 DNK<br><input type="checkbox"/> 99 Refusal | <input type="checkbox"/> <sub>5</sub><br><input type="checkbox"/> 88 DNK<br><input type="checkbox"/> 99 Refusal | <input type="checkbox"/> <sub>5</sub><br><input type="checkbox"/> 88 DNK<br><input type="checkbox"/> 99 Refusal | <input type="checkbox"/> <sub>5</sub><br><input type="checkbox"/> 88 DNK<br><input type="checkbox"/> 99 Refusal | <input type="checkbox"/> <sub>5</sub><br><input type="checkbox"/> 88 DNK<br><input type="checkbox"/> 99 Refusal |

|                                                               |                                                                                 |                                                                                 |                                                                                 |                                                                                 |                                                                                 |                                                                                 |                                                                                 |                                                                                 |                                                                                 |                                                                                 |                                                                                 |                                                                                 |
|---------------------------------------------------------------|---------------------------------------------------------------------------------|---------------------------------------------------------------------------------|---------------------------------------------------------------------------------|---------------------------------------------------------------------------------|---------------------------------------------------------------------------------|---------------------------------------------------------------------------------|---------------------------------------------------------------------------------|---------------------------------------------------------------------------------|---------------------------------------------------------------------------------|---------------------------------------------------------------------------------|---------------------------------------------------------------------------------|---------------------------------------------------------------------------------|
| 2.4 What was your age approximatively when you first used it? | -----<br><input type="checkbox"/> 88 DNK<br><input type="checkbox"/> 99 Refusal | -----<br><input type="checkbox"/> 88 DNK<br><input type="checkbox"/> 99 Refusal | -----<br><input type="checkbox"/> 88 DNK<br><input type="checkbox"/> 99 Refusal | -----<br><input type="checkbox"/> 88 DNK<br><input type="checkbox"/> 99 Refusal | -----<br><input type="checkbox"/> 88 DNK<br><input type="checkbox"/> 99 Refusal | -----<br><input type="checkbox"/> 88 DNK<br><input type="checkbox"/> 99 Refusal | -----<br><input type="checkbox"/> 88 DNK<br><input type="checkbox"/> 99 Refusal | -----<br><input type="checkbox"/> 88 DNK<br><input type="checkbox"/> 99 Refusal | -----<br><input type="checkbox"/> 88 DNK<br><input type="checkbox"/> 99 Refusal | -----<br><input type="checkbox"/> 88 DNK<br><input type="checkbox"/> 99 Refusal | -----<br><input type="checkbox"/> 88 DNK<br><input type="checkbox"/> 99 Refusal | -----<br><input type="checkbox"/> 88 DNK<br><input type="checkbox"/> 99 Refusal |
|---------------------------------------------------------------|---------------------------------------------------------------------------------|---------------------------------------------------------------------------------|---------------------------------------------------------------------------------|---------------------------------------------------------------------------------|---------------------------------------------------------------------------------|---------------------------------------------------------------------------------|---------------------------------------------------------------------------------|---------------------------------------------------------------------------------|---------------------------------------------------------------------------------|---------------------------------------------------------------------------------|---------------------------------------------------------------------------------|---------------------------------------------------------------------------------|

|                                                                           |                                                                                                                          |                                                                                                                          |                                                                                                                          |                                                                                                                          |                                                                                                                          |                                                                                                                          |                                                                                                                          |                                                                                                                          |                                                                                                                          |                                                                                                                          |                                                                                                                          |                                                                                                                          |
|---------------------------------------------------------------------------|--------------------------------------------------------------------------------------------------------------------------|--------------------------------------------------------------------------------------------------------------------------|--------------------------------------------------------------------------------------------------------------------------|--------------------------------------------------------------------------------------------------------------------------|--------------------------------------------------------------------------------------------------------------------------|--------------------------------------------------------------------------------------------------------------------------|--------------------------------------------------------------------------------------------------------------------------|--------------------------------------------------------------------------------------------------------------------------|--------------------------------------------------------------------------------------------------------------------------|--------------------------------------------------------------------------------------------------------------------------|--------------------------------------------------------------------------------------------------------------------------|--------------------------------------------------------------------------------------------------------------------------|
| 2.5 How much did you spend in the <u>last week</u> to purchase this drug? | -----<br>Baht<br><input type="checkbox"/> Free<br><input type="checkbox"/> 88 DNK<br><input type="checkbox"/> 99 Refusal | -----<br>Baht<br><input type="checkbox"/> Free<br><input type="checkbox"/> 88 DNK<br><input type="checkbox"/> 99 Refusal | -----<br>Baht<br><input type="checkbox"/> Free<br><input type="checkbox"/> 88 DNK<br><input type="checkbox"/> 99 Refusal | -----<br>Baht<br><input type="checkbox"/> Free<br><input type="checkbox"/> 88 DNK<br><input type="checkbox"/> 99 Refusal | -----<br>Baht<br><input type="checkbox"/> Free<br><input type="checkbox"/> 88 DNK<br><input type="checkbox"/> 99 Refusal | -----<br>Baht<br><input type="checkbox"/> Free<br><input type="checkbox"/> 88 DNK<br><input type="checkbox"/> 99 Refusal | -----<br>Baht<br><input type="checkbox"/> Free<br><input type="checkbox"/> 88 DNK<br><input type="checkbox"/> 99 Refusal | -----<br>Baht<br><input type="checkbox"/> Free<br><input type="checkbox"/> 88 DNK<br><input type="checkbox"/> 99 Refusal | -----<br>Baht<br><input type="checkbox"/> Free<br><input type="checkbox"/> 88 DNK<br><input type="checkbox"/> 99 Refusal | -----<br>Baht<br><input type="checkbox"/> Free<br><input type="checkbox"/> 88 DNK<br><input type="checkbox"/> 99 Refusal | -----<br>Baht<br><input type="checkbox"/> Free<br><input type="checkbox"/> 88 DNK<br><input type="checkbox"/> 99 Refusal | -----<br>Baht<br><input type="checkbox"/> Free<br><input type="checkbox"/> 88 DNK<br><input type="checkbox"/> 99 Refusal |
|---------------------------------------------------------------------------|--------------------------------------------------------------------------------------------------------------------------|--------------------------------------------------------------------------------------------------------------------------|--------------------------------------------------------------------------------------------------------------------------|--------------------------------------------------------------------------------------------------------------------------|--------------------------------------------------------------------------------------------------------------------------|--------------------------------------------------------------------------------------------------------------------------|--------------------------------------------------------------------------------------------------------------------------|--------------------------------------------------------------------------------------------------------------------------|--------------------------------------------------------------------------------------------------------------------------|--------------------------------------------------------------------------------------------------------------------------|--------------------------------------------------------------------------------------------------------------------------|--------------------------------------------------------------------------------------------------------------------------|

| SECTION 3 INJECTION DRUG USE                                  |                                                                                                                                   |                                                                                                                                                                                                                                                                                                                                                                                                                                                                                                                                                                                                                                             |
|---------------------------------------------------------------|-----------------------------------------------------------------------------------------------------------------------------------|---------------------------------------------------------------------------------------------------------------------------------------------------------------------------------------------------------------------------------------------------------------------------------------------------------------------------------------------------------------------------------------------------------------------------------------------------------------------------------------------------------------------------------------------------------------------------------------------------------------------------------------------|
| “The next questions are related to your injecting practices.” |                                                                                                                                   |                                                                                                                                                                                                                                                                                                                                                                                                                                                                                                                                                                                                                                             |
| 3.1                                                           | How old were you when you <u>injected</u> any drug <u>for the first time</u> ?                                                    | I _ _ _ years old<br><br><input type="checkbox"/> <sub>88</sub> DNK <input type="checkbox"/> <sub>99</sub> Refusal                                                                                                                                                                                                                                                                                                                                                                                                                                                                                                                          |
| 3.2                                                           | When was <u>the last time</u> you injected any drugs?                                                                             | <input type="checkbox"/> <sub>1</sub> Today/yesterday<br><input type="checkbox"/> <sub>2</sub> In last week<br><input type="checkbox"/> <sub>3</sub> In last month (but more than a week ago)<br><input type="checkbox"/> <sub>4</sub> 2-6 months ago → 3.4<br><input type="checkbox"/> <sub>88</sub> DNK <input type="checkbox"/> <sub>99</sub> Refusal                                                                                                                                                                                                                                                                                    |
| 3.3                                                           | How often did you inject any drugs during <u>the past month</u> ?                                                                 | <input type="checkbox"/> <sub>1</sub> Every day<br><input type="checkbox"/> <sub>2</sub> Every second day<br><input type="checkbox"/> <sub>3</sub> Every third day<br><input type="checkbox"/> <sub>4</sub> Once in a week<br><input type="checkbox"/> <sub>5</sub> Once in a month<br><input type="checkbox"/> <sub>88</sub> DNK <input type="checkbox"/> <sub>99</sub> Refusal                                                                                                                                                                                                                                                            |
| 3.4                                                           | In <u>the last year</u> where or from whom did you get needles/syringes for injection of drugs? <b>(Several answers possible)</b> | <input type="checkbox"/> <sub>1</sub> Purchased at a pharmacy<br><input type="checkbox"/> <sub>2</sub> In NGO which has a needles and syringes exchange programme (Specify): _____<br><input type="checkbox"/> <sub>3</sub> From friends who inject drugs<br><input type="checkbox"/> <sub>4</sub> From friends who do not inject drugs<br><input type="checkbox"/> <sub>5</sub> From family<br><input type="checkbox"/> <sub>77</sub> Other (Specify): _____<br>_____<br>_____<br>_____<br>_____<br>_____<br>_____<br>_____<br>_____<br>_____<br><input type="checkbox"/> <sub>88</sub> DNK <input type="checkbox"/> <sub>99</sub> Refusal |
| 3.5                                                           | Have you <u>ever</u> shared your syringe with other persons?                                                                      | <input type="checkbox"/> <sub>1</sub> No → 3.9<br><input type="checkbox"/> <sub>2</sub> Yes<br><input type="checkbox"/> <sub>88</sub> DNK <input type="checkbox"/> <sub>99</sub> Refusal                                                                                                                                                                                                                                                                                                                                                                                                                                                    |
| 3.6                                                           | In the last 6 months, how often have you shared your syringe?                                                                     | <input type="checkbox"/> <sub>1</sub> All the time<br><input type="checkbox"/> <sub>2</sub> Almost all the time<br><input type="checkbox"/> <sub>3</sub> Sometimes<br><input type="checkbox"/> <sub>4</sub> Almost never<br><input type="checkbox"/> <sub>5</sub> Never → 3.9<br><input type="checkbox"/> <sub>88</sub> DNK <input type="checkbox"/> <sub>99</sub> Refusal                                                                                                                                                                                                                                                                  |
| 3.7                                                           | Do you usually clean your syringes before sharing them?                                                                           | <input type="checkbox"/> <sub>1</sub> No → 3.9<br><input type="checkbox"/> <sub>2</sub> Yes<br><input type="checkbox"/> <sub>88</sub> DNK <input type="checkbox"/> <sub>99</sub> Refusal                                                                                                                                                                                                                                                                                                                                                                                                                                                    |

|      |                                                                                                            |                                                                                                                                                                                                                                                                                                                                                                                                                                                                                   |
|------|------------------------------------------------------------------------------------------------------------|-----------------------------------------------------------------------------------------------------------------------------------------------------------------------------------------------------------------------------------------------------------------------------------------------------------------------------------------------------------------------------------------------------------------------------------------------------------------------------------|
| 3.8  | Which products do you use to clean your syringes when you share them?<br><b>(Several answers possible)</b> | <input type="checkbox"/> <sub>1</sub> Water<br><input type="checkbox"/> <sub>2</sub> Bleach<br><input type="checkbox"/> <sub>3</sub> Boiling<br><input type="checkbox"/> <sub>4</sub> Disinfectants<br><input type="checkbox"/> <sub>5</sub> Burning<br><input type="checkbox"/> <sub>77</sub> Other (Specify): _____<br>_____<br>_____<br>_____<br><div style="text-align: right;"><input type="checkbox"/><sub>88</sub> DNK <input type="checkbox"/><sub>99</sub> Refusal</div> |
| 3.9  | Have you <u>ever</u> shared your injecting material (containers, water, filter...) with other persons?     | <input type="checkbox"/> <sub>1</sub> No                      → 3.11<br><input type="checkbox"/> <sub>2</sub> Yes<br><div style="text-align: right;"><input type="checkbox"/><sub>88</sub> DNK <input type="checkbox"/><sub>99</sub> Refusal</div>                                                                                                                                                                                                                                |
| 3.10 | In the last 6 months, how often have you shared your injecting material (containers, water, filter...)?    | <input type="checkbox"/> <sub>1</sub> All the time<br><input type="checkbox"/> <sub>2</sub> Almost all the time<br><input type="checkbox"/> <sub>3</sub> Sometimes<br><input type="checkbox"/> <sub>4</sub> Almost never<br><input type="checkbox"/> <sub>5</sub> Never<br><div style="text-align: right;"><input type="checkbox"/><sub>88</sub> DNK <input type="checkbox"/><sub>99</sub> Refusal</div>                                                                          |
| 3.11 | Have you <u>ever</u> reused your own syringe?                                                              | <input type="checkbox"/> <sub>1</sub> No                      → 3.15<br><input type="checkbox"/> <sub>2</sub> Yes<br><div style="text-align: right;"><input type="checkbox"/><sub>88</sub> DNK <input type="checkbox"/><sub>99</sub> Refusal</div>                                                                                                                                                                                                                                |
| 3.12 | In the last 6 months, how often did you reuse your own syringe?                                            | <input type="checkbox"/> <sub>1</sub> All the time<br><input type="checkbox"/> <sub>2</sub> Almost all the time<br><input type="checkbox"/> <sub>3</sub> Sometimes<br><input type="checkbox"/> <sub>4</sub> Almost never<br><input type="checkbox"/> <sub>5</sub> Never                      → 3.15<br><div style="text-align: right;"><input type="checkbox"/><sub>88</sub> DNK <input type="checkbox"/><sub>99</sub> Refusal</div>                                              |
| 3.13 | Do you usually clean your syringes before reusing them?                                                    | <input type="checkbox"/> <sub>1</sub> No                      → 3.15<br><input type="checkbox"/> <sub>2</sub> Yes<br><div style="text-align: right;"><input type="checkbox"/><sub>88</sub> DNK <input type="checkbox"/><sub>99</sub> Refusal</div>                                                                                                                                                                                                                                |
| 3.14 | Which products do you use to clean your syringes when you reuse them?<br><b>(Several answers possible)</b> | <input type="checkbox"/> <sub>1</sub> Water<br><input type="checkbox"/> <sub>2</sub> Bleach<br><input type="checkbox"/> <sub>3</sub> Boiling<br><input type="checkbox"/> <sub>4</sub> Disinfectants<br><input type="checkbox"/> <sub>5</sub> Burning<br><input type="checkbox"/> <sub>77</sub> Other (Specify): _____<br>_____<br>_____<br>_____<br><div style="text-align: right;"><input type="checkbox"/><sub>88</sub> DNK <input type="checkbox"/><sub>99</sub> Refusal</div> |

|      |                                                                                       |                                                                                                                                                                                                                                                                               |
|------|---------------------------------------------------------------------------------------|-------------------------------------------------------------------------------------------------------------------------------------------------------------------------------------------------------------------------------------------------------------------------------|
| 3.15 | The last time you injected drugs, did you use a new needle and syringe?               | <input type="checkbox"/> <sub>1</sub> No<br><input type="checkbox"/> <sub>2</sub> Yes<br><input type="checkbox"/> <sub>3</sub> I don't remember<br><span style="float: right;"><input type="checkbox"/><sub>88</sub> DNK <input type="checkbox"/><sub>99</sub> Refusal</span> |
| 3.16 | Have you ever experienced an overdose (exceeding the limit of the usual drug amount)? | <input type="checkbox"/> <sub>1</sub> No<br><input type="checkbox"/> <sub>2</sub> Yes<br><span style="float: right;"><input type="checkbox"/><sub>88</sub> DNK <input type="checkbox"/><sub>99</sub> Refusal</span>                                                           |

**SECTION 4 SEXUAL RISK BEHAVIORS AND OTHER RISK FACTORS**

“Now I am going to ask you some questions about your sexual behavior and tattoo experience. I remind you again that all your responses are completely confidential, and that you can ask to skip a question if you prefer not to answer.”

|     |                                                           |                                                                                                                                                                                                                                                                                                                                                                                                                                                  |
|-----|-----------------------------------------------------------|--------------------------------------------------------------------------------------------------------------------------------------------------------------------------------------------------------------------------------------------------------------------------------------------------------------------------------------------------------------------------------------------------------------------------------------------------|
| 4.1 | Have you ever had sex?                                    | <input type="checkbox"/> <sub>1</sub> No → 4.6<br><input type="checkbox"/> <sub>2</sub> Yes<br><span style="float: right;"><input type="checkbox"/><sub>88</sub> DNK <input type="checkbox"/><sub>99</sub> Refusal</span>                                                                                                                                                                                                                        |
| 4.2 | Have you ever received money in exchange of sex?          | <input type="checkbox"/> <sub>1</sub> No → 4.4<br><input type="checkbox"/> <sub>2</sub> Yes<br><span style="float: right;"><input type="checkbox"/><sub>88</sub> DNK <input type="checkbox"/><sub>99</sub> Refusal</span>                                                                                                                                                                                                                        |
| 4.3 | Is sex work your main source of income?                   | <input type="checkbox"/> <sub>1</sub> No<br><input type="checkbox"/> <sub>2</sub> Yes<br><span style="float: right;"><input type="checkbox"/><sub>88</sub> DNK <input type="checkbox"/><sub>99</sub> Refusal</span>                                                                                                                                                                                                                              |
| 4.4 | Have you ever received drug in exchange of sex?           | <input type="checkbox"/> <sub>1</sub> No<br><input type="checkbox"/> <sub>2</sub> Yes<br><span style="float: right;"><input type="checkbox"/><sub>88</sub> DNK <input type="checkbox"/><sub>99</sub> Refusal</span>                                                                                                                                                                                                                              |
| 4.5 | Have you ever had sex with a same-sex partner?            | <input type="checkbox"/> <sub>1</sub> No<br><input type="checkbox"/> <sub>2</sub> Yes<br><span style="float: right;"><input type="checkbox"/><sub>88</sub> DNK <input type="checkbox"/><sub>99</sub> Refusal</span>                                                                                                                                                                                                                              |
| 4.6 | Do you have any tattoo or piercing?                       | <input type="checkbox"/> <sub>1</sub> No → Section 5<br><input type="checkbox"/> <sub>2</sub> Yes<br><span style="float: right;"><input type="checkbox"/><sub>88</sub> DNK <input type="checkbox"/><sub>99</sub> Refusal</span>                                                                                                                                                                                                                  |
| 4.7 | Where did you do it?<br><b>(Several answers possible)</b> | <input type="checkbox"/> <sub>1</sub> Professional tattoo parlor<br><input type="checkbox"/> <sub>2</sub> Temple<br><input type="checkbox"/> <sub>3</sub> Prison<br><input type="checkbox"/> <sub>4</sub> With friends<br><input type="checkbox"/> <sub>77</sub> Other (Specify): _____<br>_____<br>_____<br>_____<br><span style="float: right;"><input type="checkbox"/><sub>88</sub> DNK <input type="checkbox"/><sub>99</sub> Refusal</span> |



**SECTION 5 HCV KNOWLEDGE AND TESTING**

“Now, I am going to ask you some questions about hepatitis C infection.

If you want to know more about hepatitis C, you can ask questions at the end of the interview and we’ll give you a brochure with information on the disease.

If you want to be tested for hepatitis C virus infection, we can refer you to a free testing facility at the end of the interview.”

|     |                                                                                                                                                            |                                                                                                                                                                                                                                                                                                                                                                                                 |
|-----|------------------------------------------------------------------------------------------------------------------------------------------------------------|-------------------------------------------------------------------------------------------------------------------------------------------------------------------------------------------------------------------------------------------------------------------------------------------------------------------------------------------------------------------------------------------------|
| 5.1 | Have you ever heard of the hepatitis C virus before this interview?                                                                                        | <input type="checkbox"/> <sub>1</sub> No → Section 6<br><input type="checkbox"/> <sub>2</sub> Yes<br><div style="text-align: right;"><input type="checkbox"/><sub>88</sub> DNK <input type="checkbox"/><sub>99</sub> Refusal</div>                                                                                                                                                              |
| 5.2 | Can you tell the symptoms of the hepatitis C virus infection?<br><b>(Write all the answers in the order they were mentioned)</b>                           | <p>-----</p> <p>-----</p> <p>-----</p> <p>-----</p> <p>-----</p> <p>-----</p> <div style="text-align: right;"><input type="checkbox"/><sub>88</sub> DNK <input type="checkbox"/><sub>99</sub> Refusal</div>                                                                                                                                                                                     |
| 5.3 | In your opinion, can people be infected with Hepatitis C without having any symptoms?                                                                      | <input type="checkbox"/> <sub>1</sub> No<br><input type="checkbox"/> <sub>2</sub> Yes<br><div style="text-align: right;"><input type="checkbox"/><sub>88</sub> DNK <input type="checkbox"/><sub>99</sub> Refusal</div>                                                                                                                                                                          |
| 5.4 | Can you tell what you think is the main route of transmission of the hepatitis C virus?<br><b>(Write all the answers in the order they were mentioned)</b> | <p>-----</p> <p>-----</p> <p>-----</p> <p>-----</p> <p>-----</p> <p>-----</p> <div style="text-align: right;"><input type="checkbox"/><sub>88</sub> DNK <input type="checkbox"/><sub>99</sub> Refusal</div>                                                                                                                                                                                     |
| 5.5 | Have you ever had an HCV test?                                                                                                                             | <input type="checkbox"/> <sub>1</sub> No → Section 6<br><input type="checkbox"/> <sub>2</sub> Yes, in the last 12 months<br><input type="checkbox"/> <sub>3</sub> Yes, more than 12 months ago<br><div style="text-align: right;"><input type="checkbox"/><sub>88</sub> DNK <input type="checkbox"/><sub>99</sub> Refusal</div>                                                                 |
| 5.6 | Where have you been tested for HCV?                                                                                                                        | <input type="checkbox"/> <sub>1</sub> Napneung project at AMS / CMU<br><input type="checkbox"/> <sub>77</sub> Other (Specify): _____<br><p>-----</p> <p>-----</p> <p>-----</p> <div style="text-align: right;"><input type="checkbox"/><sub>88</sub> DNK <input type="checkbox"/><sub>99</sub> Refusal</div>                                                                                    |
| 5.7 | What was the result of your last test?                                                                                                                     | <input type="checkbox"/> <sub>1</sub> Positive<br><input type="checkbox"/> <sub>2</sub> Negative → Section 6<br><input type="checkbox"/> <sub>3</sub> Do not remember → Section 6<br><input type="checkbox"/> <sub>4</sub> Result not communicated → Section 6<br><div style="text-align: right;"><input type="checkbox"/><sub>88</sub> DNK <input type="checkbox"/><sub>99</sub> Refusal</div> |

|     |                               |                                                                                                                                                                                                                                                                      |
|-----|-------------------------------|----------------------------------------------------------------------------------------------------------------------------------------------------------------------------------------------------------------------------------------------------------------------|
| 5.8 | Were you offered a treatment? | <input type="checkbox"/> <sub>1</sub> No<br><input type="checkbox"/> <sub>2</sub> Yes (Specify): _____<br>_____<br>_____<br>_____<br><div style="text-align: right;"><input type="checkbox"/><sub>88</sub> DNK   <input type="checkbox"/><sub>99</sub> Refusal</div> |
|-----|-------------------------------|----------------------------------------------------------------------------------------------------------------------------------------------------------------------------------------------------------------------------------------------------------------------|

**SECTION 6 ACCESS TO HEALTH CARE**

"I will now ask you some questions about your access to health care services."

|     |                                 |                                                                                                                                                                                                                                                     |
|-----|---------------------------------|-----------------------------------------------------------------------------------------------------------------------------------------------------------------------------------------------------------------------------------------------------|
| 6.1 | Do you have a health insurance? | <input type="checkbox"/> <sub>1</sub> No                      → 6.3<br><input type="checkbox"/> <sub>2</sub> Yes<br><div style="text-align: right;"><input type="checkbox"/><sub>88</sub> DNK   <input type="checkbox"/><sub>99</sub> Refusal</div> |
|-----|---------------------------------|-----------------------------------------------------------------------------------------------------------------------------------------------------------------------------------------------------------------------------------------------------|

|     |                                      |                                                                                                                                                                                                                                                                                                                                                                                                                                                             |
|-----|--------------------------------------|-------------------------------------------------------------------------------------------------------------------------------------------------------------------------------------------------------------------------------------------------------------------------------------------------------------------------------------------------------------------------------------------------------------------------------------------------------------|
| 6.2 | What is your health coverage scheme? | <input type="checkbox"/> <sub>1</sub> Universal health care<br><input type="checkbox"/> <sub>2</sub> Social Security Scheme<br><input type="checkbox"/> <sub>3</sub> CSMBS<br><input type="checkbox"/> <sub>4</sub> Private insurance<br><input type="checkbox"/> <sub>77</sub> Other (Specify): _____<br>_____<br>_____<br><div style="text-align: right;"><input type="checkbox"/><sub>88</sub> DNK   <input type="checkbox"/><sub>99</sub> Refusal</div> |
|-----|--------------------------------------|-------------------------------------------------------------------------------------------------------------------------------------------------------------------------------------------------------------------------------------------------------------------------------------------------------------------------------------------------------------------------------------------------------------------------------------------------------------|

|     |                                                       |                                                                                                                                                                                                                                                                                                                                                                                                                                                                                                                                                                                         |
|-----|-------------------------------------------------------|-----------------------------------------------------------------------------------------------------------------------------------------------------------------------------------------------------------------------------------------------------------------------------------------------------------------------------------------------------------------------------------------------------------------------------------------------------------------------------------------------------------------------------------------------------------------------------------------|
| 6.3 | Where do you usually go when you have a health issue? | <input type="checkbox"/> <sub>1</sub> Do not look for care (Specify why): _____<br>_____<br>_____<br>_____<br><input type="checkbox"/> <sub>2</sub> Local health station<br><input type="checkbox"/> <sub>3</sub> Public hospital<br><input type="checkbox"/> <sub>4</sub> Private hospital or clinic<br><input type="checkbox"/> <sub>5</sub> Traditional healer<br><input type="checkbox"/> <sub>77</sub> Other (Specify): _____<br>_____<br>_____<br><div style="text-align: right;"><input type="checkbox"/><sub>88</sub> DNK   <input type="checkbox"/><sub>99</sub> Refusal</div> |
|-----|-------------------------------------------------------|-----------------------------------------------------------------------------------------------------------------------------------------------------------------------------------------------------------------------------------------------------------------------------------------------------------------------------------------------------------------------------------------------------------------------------------------------------------------------------------------------------------------------------------------------------------------------------------------|

|     |                                                                                                                                             |                                                                                                                                                                                                                                                                                                                                                                                                                                                                                                                                                              |
|-----|---------------------------------------------------------------------------------------------------------------------------------------------|--------------------------------------------------------------------------------------------------------------------------------------------------------------------------------------------------------------------------------------------------------------------------------------------------------------------------------------------------------------------------------------------------------------------------------------------------------------------------------------------------------------------------------------------------------------|
| 6.4 | What kind of barriers to access health care have you ever experienced?<br><i>(Show the card with the answers, several answers possible)</i> | <input type="checkbox"/> <sub>1</sub> Fear of police<br><input type="checkbox"/> <sub>2</sub> Fear of stigma<br><input type="checkbox"/> <sub>3</sub> Too expensive<br><input type="checkbox"/> <sub>4</sub> Too far<br><input type="checkbox"/> <sub>5</sub> Fear of diagnosis<br><input type="checkbox"/> <sub>6</sub> None<br><input type="checkbox"/> <sub>77</sub> Other (Specify): _____<br>_____<br>_____<br>_____<br><div style="text-align: right;"><input type="checkbox"/><sub>88</sub> DNK   <input type="checkbox"/><sub>99</sub> Refusal</div> |
|-----|---------------------------------------------------------------------------------------------------------------------------------------------|--------------------------------------------------------------------------------------------------------------------------------------------------------------------------------------------------------------------------------------------------------------------------------------------------------------------------------------------------------------------------------------------------------------------------------------------------------------------------------------------------------------------------------------------------------------|

|      |                                                                                                          |                                                                                                                                                                                                                                                  |                                                                                           |
|------|----------------------------------------------------------------------------------------------------------|--------------------------------------------------------------------------------------------------------------------------------------------------------------------------------------------------------------------------------------------------|-------------------------------------------------------------------------------------------|
| 6.5  | Have you ever been refused medical care?                                                                 | <input type="checkbox"/> <sub>1</sub> No<br><input type="checkbox"/> <sub>2</sub> Yes                                                                                                                                                            | <input type="checkbox"/> <sub>88</sub> DNK <input type="checkbox"/> <sub>99</sub> Refusal |
| 6.6  | Have you ever experienced discriminatory attitudes in health care settings in relation to your drug use? | <input type="checkbox"/> <sub>1</sub> No<br><input type="checkbox"/> <sub>2</sub> Yes (Specify): _____<br>_____<br>_____<br>_____<br>_____                                                                                                       | <input type="checkbox"/> <sub>88</sub> DNK <input type="checkbox"/> <sub>99</sub> Refusal |
| 6.7  | Have you ever received care for drug addiction problems?                                                 | <input type="checkbox"/> <sub>1</sub> No                   → 6.10<br><input type="checkbox"/> <sub>2</sub> Yes                                                                                                                                   | <input type="checkbox"/> <sub>88</sub> DNK <input type="checkbox"/> <sub>99</sub> Refusal |
| 6.8  | Are you or have you been on MMT?                                                                         | <input type="checkbox"/> <sub>1</sub> No<br><input type="checkbox"/> <sub>2</sub> Yes (Still receiving MMT: <input type="checkbox"/> <sub>1</sub> No <input type="checkbox"/> <sub>2</sub> Yes)                                                  | <input type="checkbox"/> <sub>88</sub> DNK <input type="checkbox"/> <sub>99</sub> Refusal |
| 6.9  | Have you ever been on <u>voluntary</u> drug rehabilitation?                                              | <input type="checkbox"/> <sub>1</sub> No<br><input type="checkbox"/> <sub>2</sub> Yes (Specify where for each time):<br>1 <sup>st</sup> time: _____<br>2 <sup>nd</sup> time: _____<br>3 <sup>rd</sup> time: _____<br>4 <sup>th</sup> time: _____ | <input type="checkbox"/> <sub>88</sub> DNK <input type="checkbox"/> <sub>99</sub> Refusal |
| 6.10 | Are you a member of a support group for drug users?                                                      | <input type="checkbox"/> <sub>1</sub> No<br><input type="checkbox"/> <sub>2</sub> Yes (Specify): _____                                                                                                                                           | <input type="checkbox"/> <sub>88</sub> DNK <input type="checkbox"/> <sub>99</sub> Refusal |
| 6.11 | Have you ever participated in a health survey targeting drug users?                                      | <input type="checkbox"/> <sub>1</sub> No<br><input type="checkbox"/> <sub>2</sub> Yes                                                                                                                                                            | <input type="checkbox"/> <sub>88</sub> DNK <input type="checkbox"/> <sub>99</sub> Refusal |

|                                                                                                      |                                                                                |                                                                                                               |                                                                                           |
|------------------------------------------------------------------------------------------------------|--------------------------------------------------------------------------------|---------------------------------------------------------------------------------------------------------------|-------------------------------------------------------------------------------------------|
| <b>SECTION 7 CONTACT WITH THE POLICE/PRISON/CORRECTION AND SIMILAR FACILITIES</b>                    |                                                                                |                                                                                                               |                                                                                           |
| "Now I am going to ask you about your contacts with the police and/or other representatives of law." |                                                                                |                                                                                                               |                                                                                           |
| 7.1                                                                                                  | Have you <u>ever</u> been arrested by the police in relation to your drug use? | <input type="checkbox"/> <sub>1</sub> No<br><input type="checkbox"/> <sub>2</sub> Yes                         | <input type="checkbox"/> <sub>88</sub> DNK <input type="checkbox"/> <sub>99</sub> Refusal |
| 7.2                                                                                                  | Have you <u>ever</u> been in prison?                                           | <input type="checkbox"/> <sub>1</sub> No                   → 7.6<br><input type="checkbox"/> <sub>2</sub> Yes | <input type="checkbox"/> <sub>88</sub> DNK <input type="checkbox"/> <sub>99</sub> Refusal |

|     |                                                                              |                                                                                                                                                                                                                                                                                                                                        |
|-----|------------------------------------------------------------------------------|----------------------------------------------------------------------------------------------------------------------------------------------------------------------------------------------------------------------------------------------------------------------------------------------------------------------------------------|
| 7.3 | Have you <u>ever</u> used drugs while in prison?                             | <input type="checkbox"/> <sub>1</sub> No → 7.6<br><input type="checkbox"/> <sub>2</sub> Yes<br><input type="checkbox"/> <sub>88</sub> DNK <input type="checkbox"/> <sub>99</sub> Refusal                                                                                                                                               |
| 7.4 | Have you <u>ever</u> injected drugs while in prison?                         | <input type="checkbox"/> <sub>1</sub> No → 7.6<br><input type="checkbox"/> <sub>2</sub> Yes<br><input type="checkbox"/> <sub>88</sub> DNK <input type="checkbox"/> <sub>99</sub> Refusal                                                                                                                                               |
| 7.5 | Have you shared syringes with other persons while in prison?                 | <input type="checkbox"/> <sub>1</sub> No<br><input type="checkbox"/> <sub>2</sub> Yes<br><input type="checkbox"/> <sub>88</sub> DNK <input type="checkbox"/> <sub>99</sub> Refusal                                                                                                                                                     |
| 7.6 | Have you ever been in <u>compulsory</u> drug treatment?                      | <input type="checkbox"/> <sub>1</sub> No → Section 8<br><input type="checkbox"/> <sub>2</sub> Yes (Specify how many times): _____<br><input type="checkbox"/> <sub>88</sub> DNK <input type="checkbox"/> <sub>99</sub> Refusal                                                                                                         |
| 7.7 | What was the compulsory drug treatment?<br><b>(Several answers possible)</b> | <input type="checkbox"/> <sub>1</sub> Inpatient<br><input type="checkbox"/> <sub>2</sub> Outpatient<br><input type="checkbox"/> <sub>3</sub> Military boot camp<br><input type="checkbox"/> <sub>77</sub> Other (Specify): _____<br>_____<br><input type="checkbox"/> <sub>88</sub> DNK <input type="checkbox"/> <sub>99</sub> Refusal |

| SECTION 8 EXPECTATIONS OF HEALTH CARE SYSTEM |                                                                                                                                                      |                                                                                                                                                                                                                                                                                                                                                                 |
|----------------------------------------------|------------------------------------------------------------------------------------------------------------------------------------------------------|-----------------------------------------------------------------------------------------------------------------------------------------------------------------------------------------------------------------------------------------------------------------------------------------------------------------------------------------------------------------|
| 8.1                                          | If you need information about health issues, where do you look for them?<br><b>(Show the card with the answers, several answers possible)</b>        | <input type="checkbox"/> <sub>1</sub> Ask health care professionals<br><input type="checkbox"/> <sub>2</sub> Ask friends<br><input type="checkbox"/> <sub>3</sub> Search on the internet<br><input type="checkbox"/> <sub>77</sub> Other (Specify): _____<br>_____<br><input type="checkbox"/> <sub>88</sub> DNK <input type="checkbox"/> <sub>99</sub> Refusal |
| 8.2                                          | <b>(Skip this question in case the person already knows that she/he is infected with HCV)</b><br>Would you be interested in knowing your HCV status? | <input type="checkbox"/> <sub>1</sub> No (Specify why): _____<br>_____<br><input type="checkbox"/> <sub>2</sub> Yes<br><input type="checkbox"/> <sub>88</sub> DNK <input type="checkbox"/> <sub>99</sub> Refusal                                                                                                                                                |
| 8.3                                          | If there was a new HCV treatment available in Thailand, would you like to be informed?                                                               | <input type="checkbox"/> <sub>1</sub> No → 8.5<br><br>(Specify why): _____<br>_____<br><input type="checkbox"/> <sub>2</sub> Yes<br><input type="checkbox"/> <sub>88</sub> DNK <input type="checkbox"/> <sub>99</sub> Refusal                                                                                                                                   |

|     |                                                                                                                                             |                                                                                                                                                                                                                                                                                                                                                                                                                                            |
|-----|---------------------------------------------------------------------------------------------------------------------------------------------|--------------------------------------------------------------------------------------------------------------------------------------------------------------------------------------------------------------------------------------------------------------------------------------------------------------------------------------------------------------------------------------------------------------------------------------------|
| 8.4 | What would be the best way to inform you?                                                                                                   | <input type="checkbox"/> <sub>1</sub> Poster/leaflet in a NGO<br><input type="checkbox"/> <sub>2</sub> Website<br><input type="checkbox"/> <sub>3</sub> Text messages<br><input type="checkbox"/> <sub>4</sub> Telephone call<br><input type="checkbox"/> <sub>77</sub> Other (Specify): _____<br>_____<br><div style="text-align: right;"><input type="checkbox"/><sub>88</sub> DNK   <input type="checkbox"/><sub>99</sub> Refusal</div> |
| 8.5 | What suggestions do you have to improve the governmental policies toward people who inject drugs?<br><b><i>(Write down all answers)</i></b> | _____<br>_____<br>_____<br>_____<br>_____<br>_____<br><div style="text-align: right;"><input type="checkbox"/><sub>88</sub> DNK   <input type="checkbox"/><sub>99</sub> Refusal</div>                                                                                                                                                                                                                                                      |



**SECTION 10 INTERVIEWER'S EVALUATION*****To be completed once the interviewee has left the room***

|      |                                                                                  |                                                                                                                                                                                                                                                                                                                                                                                                                                                                                                                                                                                                                   |
|------|----------------------------------------------------------------------------------|-------------------------------------------------------------------------------------------------------------------------------------------------------------------------------------------------------------------------------------------------------------------------------------------------------------------------------------------------------------------------------------------------------------------------------------------------------------------------------------------------------------------------------------------------------------------------------------------------------------------|
| 10.1 | Time interview end                                                               | _ _  H  _ _  M                                                                                                                                                                                                                                                                                                                                                                                                                                                                                                                                                                                                    |
| 10.2 | The interview was performed:                                                     | <input type="checkbox"/> <sub>1</sub> Without any interruption<br><input type="checkbox"/> <sub>2</sub> The person showed signs that he/she wanted to stop the interview<br><input type="checkbox"/> <sub>3</sub> Was interrupted several times                                                                                                                                                                                                                                                                                                                                                                   |
| 10.3 | Describe the person interviewed :<br><b><i>(Can be more than one answer)</i></b> | <input type="checkbox"/> <sub>1</sub> Has a visible physical problem or handicap<br><input type="checkbox"/> <sub>2</sub> Was relaxed<br><input type="checkbox"/> <sub>3</sub> Was OK<br><input type="checkbox"/> <sub>4</sub> Was very emotional<br><input type="checkbox"/> <sub>5</sub> Was watching at the time<br><input type="checkbox"/> <sub>6</sub> Had difficulty understanding<br><input type="checkbox"/> <sub>7</sub> Had difficulty expressing her/himself<br><input type="checkbox"/> <sub>8</sub> Had difficulty remembering events<br><input type="checkbox"/> <sub>9</sub> Was physically tired |
| 10.4 | The answers seemed:                                                              | <input type="checkbox"/> <sub>1</sub> Very reliable<br><input type="checkbox"/> <sub>2</sub> Reliable<br><input type="checkbox"/> <sub>3</sub> Not reliable<br><input type="checkbox"/> <sub>4</sub> Not at all reliable<br><input type="checkbox"/> <sub>88</sub> Don't know                                                                                                                                                                                                                                                                                                                                     |
| 10.5 | Comments:                                                                        | -----<br>-----<br>-----<br>-----<br>-----<br>-----<br>-----<br>-----<br>-----<br>-----<br>-----<br>-----<br>-----<br>-----<br>-----<br>-----<br>-----                                                                                                                                                                                                                                                                                                                                                                                                                                                             |
